# Supplementary material for: The conjugation strategy affects antibody orientation and targeting properties of nanocarriers
Source: Royal Society of Chemistry journal article supplement (doi:10.1039/d0nr08191d), 2021-01-01
Supplement: d0nr08191d1.xlsx [file d0nr08191d1.xlsx]

## Sheet: Thiol-maleimide chemistry
				Amount in %				Amount in fmol
Accession	Peptide count	Unique peptides	Description	Nanocarrier (same for both strategies)	Maleimide conjugate	CD11c conjugate	Isotype conjugate	Nanocarrier (same for both strategies)	Maleimide conjugate	CD11c conjugate	Isotype conjugate
Q9Z126	4	4	Platelet factor 4	1.26237	2.42493	1.06618	1.3932	2.26963	3.51134	2.32752	3.1769
Q9JM99	29	27	Proteoglycan 4	1.83466	0.455832	1.38248	0.533661	4.05819	0.733487	2.66811	1.35946
P80316	1	1	T-complex protein 1 subunit epsilon	5.80799	1.12093	1.47061	1.00213	13.6323	1.84343	3.46291	2.24224
P32261	25	23	Antithrombin-III	0.764789	0.184352	0.315393	1.11029	1.68451	0.277613	0.58785	0.737565
Q91XD6	1	1	Vacuolar protein-sorting-associated protein 36	1.78186	0.444491	1.70028	0.533423	4.08248	0.722241	2.48192	1.1239
P01027	89	78	Complement C3 OS=Mus musculus OX=10090 GN=C3 PE=1 SV=3	1.1566	0.491948	8.36105	3.19805	2.49043	0.796616	5.81451	7.39034
P07744	18	8	Keratin, type II cytoskeletal 4 OS=Mus musculus OX=10090 GN=Krt4 PE=1 SV=2	1.57462	1.7856	1.38196	1.70594	2.85886	2.87246	2.95637	2.44706
P07724	65	63	Serum albumin OS=Mus musculus OX=10090 GN=Alb PE=1 SV=3	17.0592	34.4017	11.5867	18.5382	24.2477	55.8261	28.5467	32.82
P04104	31	21	Keratin, type II cytoskeletal 1 OS=Mus musculus OX=10090 GN=Krt1 PE=1 SV=4	2.04264	0.395535	1.56877	0.780852	4.80187	0.626981	3.00623	1.60105
Q9Z2T6	11	7	Keratin, type II cuticular Hb5 OS=Mus musculus OX=10090 GN=Krt85 PE=1 SV=2	1.33506	0.381409	0.722039	0.492377	2.97571	0.573192	1.41446	0.710515
P01029	32	26	Complement C4-B OS=Mus musculus OX=10090 GN=C4b PE=1 SV=3	2.46735	0.807843	1.2409	0.791675	5.60026	1.27147	2.51692	1.61979
Q8VCC6	3	3	Cerebral cavernous malformations 2 protein-like OS=Mus musculus OX=10090 GN=Ccm2l PE=2 SV=2	1.08037	0.351191	4.32459	0.38268	2.35346	0.582187	6.26776	0.986338
Q61147	43	32	Ceruloplasmin OS=Mus musculus OX=10090 GN=Cp PE=1 SV=2	3.00167	0.809672	1.96309	1.3632	6.79902	1.2588	3.84449	3.09952
Q8VEG4	1	1	Exonuclease 3'-5' domain-containing protein 2 OS=Mus musculus OX=10090 GN=Exd2 PE=1 SV=2	1.27494	0.339987	0.686196	1.4315	2.97235	0.517331	1.32826	4.05414
Q3UZ39	2	1	Leucine-rich repeat flightless-interacting protein 1 OS=Mus musculus OX=10090 GN=Lrrfip1 PE=1 SV=2	0.98563	0.183166	0.242281	0.807267	2.27371	0.27658	0.343846	1.89096
Q6IFZ9	18	10	Keratin, type II cytoskeletal 74 OS=Mus musculus OX=10090 GN=Krt74 PE=3 SV=1	1.92849	1.35041	1.43377	1.39035	4.11201	2.27617	2.8465	2.74168
Q9Z331;Q99M73	34	5	Keratin, type II cytoskeletal 6B OS=Mus musculus OX=10090 GN=Krt6b PE=1 SV=3	2.60016	1.96474	1.66792	1.83645	5.27078	3.17614	3.67499	3.38956
Q9Z0Y2	1	1	Phospholipase A2 OS=Mus musculus OX=10090 GN=Pla2g1b PE=1 SV=1	0.304687	0.0621951	0.0517073	0.0802934	0.715144	0.093115	0.120136	0.159716
P02535	23	15	Keratin, type I cytoskeletal 10 OS=Mus musculus OX=10090 GN=Krt10 PE=1 SV=3	1.361	0.354067	0.806468	0.787151	3.13741	0.550125	1.56449	1.77283
P01629	1	1	Ig kappa chain V-II region 2S1.3 OS=Mus musculus OX=10090 PE=1 SV=1	0.115308	0.18505	0.2596	0.160434	0.194664	0.299722	0.407901	0.312076
Q6SJQ7	3	2	CMRF35-like molecule 1 OS=Mus musculus OX=10090 GN=Cd300lf PE=1 SV=1	0.228476	0.0518752	0.0679767	0.0860708	0.531995	0.0816951	0.12162	0.194063
P29788	20	17	Vitronectin OS=Mus musculus OX=10090 GN=Vtn PE=1 SV=2	1.28013	0.872392	0.611622	0.596472	2.04671	1.35134	1.30581	1.19315
Q8VED5	16	7	Keratin, type II cytoskeletal 79 OS=Mus musculus OX=10090 GN=Krt79 PE=1 SV=2	0.905848	0.247177	0.562676	2.09658	2.10173	0.398102	1.12465	1.99648
Q6NZE7	2	1	Protein FAM122B OS=Mus musculus OX=10090 GN=Fam122b PE=1 SV=2	1.11873	0.179172	0.211511	0.563706	2.40789	0.301091	0.499473	0.677594
Q9Z320	2	1	Keratin, type I cytoskeletal 27 OS=Mus musculus OX=10090 GN=Krt27 PE=1 SV=1	1.21431	0.231108	0.446239	0.2707	2.84528	0.362642	0.864175	0.517861
O54887	2	2	Testis-specific serine kinase substrate OS=Mus musculus OX=10090 GN=Tsks PE=1 SV=4	0.118352	0.0480707	0.0617953	0.0605027	0.263884	0.0744943	0.131809	0.0844552
P69566	3	2	Ran-binding protein 9 OS=Mus musculus OX=10090 GN=Ranbp9 PE=1 SV=1	0.274526	0.0453766	0.268157	0.0301897	0.642877	0.0665931	0.16779	0.0508742
Q3TTY5	25	16	Keratin, type II cytoskeletal 2 epidermal OS=Mus musculus OX=10090 GN=Krt2 PE=1 SV=1	1.47657	2.43789	0.959246	0.819054	2.80123	3.43505	1.49822	1.723
O08677	24	18	Kininogen-1 OS=Mus musculus OX=10090 GN=Kng1 PE=1 SV=1	1.78903	0.759092	1.15412	0.896272	3.83291	1.20419	2.46722	1.69533
Q9ESB3	29	25	Histidine-rich glycoprotein OS=Mus musculus OX=10090 GN=Hrg PE=1 SV=2	1.55435	2.08494	7.10494	2.21701	2.41516	3.35536	3.96547	3.87613
Q05722	2	2	Collagen alpha-1(IX) chain OS=Mus musculus OX=10090 GN=Col9a1 PE=2 SV=2	0.992299	0.375757	0.493395	0.61585	2.16338	0.58936	0.976757	1.46614
Q9R0H5	19	8	Keratin, type II cytoskeletal 71 OS=Mus musculus OX=10090 GN=Krt71 PE=1 SV=1	1.27591	0.289241	1.22444	0.381223	2.99375	0.468952	1.99609	0.931316
P01867	16	15	Ig gamma-2B chain C region OS=Mus musculus OX=10090 GN=Igh-3 PE=1 SV=3	0.904182	1.40528	0.865323	1.17731	1.43258	2.33826	2.11945	2.14243
P01872	22	20	Immunoglobulin heavy constant mu OS=Mus musculus OX=10090 GN=Ighm PE=1 SV=2	0.70271	0.618157	1.5929	0.764916	1.15678	0.973451	3.4033	1.41597
P07759	22	13	Serine protease inhibitor A3K OS=Mus musculus OX=10090 GN=Serpina3k PE=1 SV=2	1.12013	0.681698	0.509339	0.929292	2.4101	1.09319	1.12866	1.35863
Q8CIN4	2	1	Serine/threonine-protein kinase PAK 2 OS=Mus musculus OX=10090 GN=Pak2 PE=1 SV=1	0.333729	0.515361	1.75745	0.451766	0.601605	0.740568	0.999316	0.677774
P29699	11	9	Alpha-2-HS-glycoprotein OS=Mus musculus OX=10090 GN=Ahsg PE=1 SV=1	0.485772	0.439987	1.00993	0.465388	0.971244	0.718739	1.71531	0.914005
P08730	17	5	Keratin, type I cytoskeletal 13 OS=Mus musculus OX=10090 GN=Krt13 PE=1 SV=2	0.740683	0.48149	0.503408	0.407304	1.60856	0.776502	1.06829	0.752184
Q922U2	34	15	Keratin, type II cytoskeletal 5 OS=Mus musculus OX=10090 GN=Krt5 PE=1 SV=1	0.784448	0.166978	0.494217	0.894946	1.81803	0.262662	1.01318	2.30302
Q61897;Q9D646	7	3	Keratin, type I cuticular Ha3-II OS=Mus musculus OX=10090 GN=Krt33b PE=1 SV=2	0.112625	0.0969531	0.0231841	0.139612	0.225448	0.156144	0.0458111	0.200485
P28666	54	28	Murinoglobulin-2 OS=Mus musculus OX=10090 GN=Mug2 PE=1 SV=2	0.528803	0.61027	0.2674	0.502658	0.988122	0.965009	0.571461	1.00386
Q6IFX2	29	13	Keratin, type I cytoskeletal 42 OS=Mus musculus OX=10090 GN=Krt42 PE=1 SV=1	0.767162	1.44973	0.489467	1.02548	1.19857	2.26947	1.13323	1.64621
P11276	59	49	Fibronectin OS=Mus musculus OX=10090 GN=Fn1 PE=1 SV=4	0.650242	0.47679	1.42582	0.473822	1.2319	0.735743	0.999415	0.99049
Q9DCV7	12	5	Keratin, type II cytoskeletal 7 OS=Mus musculus OX=10090 GN=Krt7 PE=1 SV=1	0.485543	0.108972	0.420359	0.208	1.10882	0.164786	0.753361	0.246894
P63157	2	1	BarH-like 1 homeobox protein OS=Mus musculus OX=10090 GN=Barhl1 PE=2 SV=1	0.330665	0.135796	1.33759	0.198097	0.732814	0.222586	0.547941	0.467807
Q00623	28	25	Apolipoprotein A-I OS=Mus musculus OX=10090 GN=Apoa1 PE=1 SV=2	0.475539	0.740932	0.366644	0.821957	0.862584	1.20411	0.91106	1.41137
Q61247	7	7	Alpha-2-antiplasmin OS=Mus musculus OX=10090 GN=Serpinf2 PE=1 SV=1	0.696198	0.468674	1.84273	0.531776	1.38686	0.756667	0.910271	0.758696
P14106	8	7	Complement C1q subcomponent subunit B OS=Mus musculus OX=10090 GN=C1qb PE=1 SV=2	0.234337	0.185546	1.01895	0.239352	0.423195	0.291487	2.55566	0.463344
Q812A3	3	3	Ankyrin repeat domain-containing protein 23 OS=Mus musculus OX=10090 GN=Ankrd23 PE=2 SV=1	0.130338	0.0381721	0.0243492	0.0391438	0.294112	0.0569019	0.0499782	0.0613848
Q3UVG3	2	1	Protein FAM91A1 OS=Mus musculus OX=10090 GN=Fam91a1 PE=1 SV=1	0.494321	0.154072	0.384077	0.209683	1.07469	0.246754	0.559343	0.289968
P19001	22	6	Keratin, type I cytoskeletal 19 OS=Mus musculus OX=10090 GN=Krt19 PE=1 SV=1	0.333713	0.105152	0.312905	0.156808	0.748095	0.167937	0.501391	0.318972
Q61781	35	10	Keratin, type I cytoskeletal 14 OS=Mus musculus OX=10090 GN=Krt14 PE=1 SV=2	0.30217	0.0934408	0.117269	0.154568	0.688636	0.151503	0.200348	0.268988
P21614	27	24	Vitamin D-binding protein OS=Mus musculus OX=10090 GN=Gc PE=1 SV=2	0.711261	0.371573	0.426761	0.32568	1.56774	0.60554	0.758353	0.546988
P50446	32	3	Keratin, type II cytoskeletal 6A OS=Mus musculus OX=10090 GN=Krt6a PE=1 SV=3	0.37986	0.14604	0.275255	0.16504	0.854467	0.237187	0.523202	0.318447
Q6NXH9	29	16	Keratin, type II cytoskeletal 73 OS=Mus musculus OX=10090 GN=Krt73 PE=1 SV=1	0.658884	0.120876	0.439776	0.170784	1.53473	0.186321	0.821993	0.355827
P19123	4	3	Troponin C, slow skeletal and cardiac muscles OS=Mus musculus OX=10090 GN=Tnnc1 PE=1 SV=1	0.328328	0.103924	0.188787	0.0941717	0.666852	0.163116	0.227484	0.203457
Q8BGZ7	21	7	Keratin, type II cytoskeletal 75 OS=Mus musculus OX=10090 GN=Krt75 PE=1 SV=1	0.375657	0.0840386	0.308046	0.128291	0.864735	0.134874	0.608038	0.279986
Q99M87	4	3	DnaJ homolog subfamily A member 3, mitochondrial OS=Mus musculus OX=10090 GN=Dnaja3 PE=1 SV=1	0.0345234	0.0678395	0.0154468	0.0656126	0.0555149	0.114279	0.0391088	0.106094
Q9Z2K1	29	16	Keratin, type I cytoskeletal 16 OS=Mus musculus OX=10090 GN=Krt16 PE=1 SV=3	0.63609	0.885805	1.11687	0.780985	1.06162	1.44916	1.0198	1.41916
A2AEV7	2	2	Coiled-coil domain-containing protein 120 OS=Mus musculus OX=10090 GN=Ccdc120 PE=1 SV=1	0.250631	0.0262491	0.0977222	0.028192	0.599947	0.0432295	0.153392	0.0408291
Q61414	26	13	Keratin, type I cytoskeletal 15 OS=Mus musculus OX=10090 GN=Krt15 PE=1 SV=2	0.321973	0.249691	0.365126	1.37884	0.688607	0.411406	0.525838	3.2091
P98086	7	5	Complement C1q subcomponent subunit A OS=Mus musculus OX=10090 GN=C1qa PE=1 SV=2	0.110105	0.0496701	0.432809	0.0772105	0.192447	0.0738681	1.09824	0.183842
Q9D5N8	3	2	Spermidine/spermine N(1)-acetyltransferase-like protein 1 OS=Mus musculus OX=10090 GN=Satl1 PE=2 SV=2	0.139705	0.0469864	0.436458	0.0698445	0.308854	0.0780367	0.589158	0.158971
Q7TQK0	1	1	Cyclin-T2 OS=Mus musculus OX=10090 GN=Ccnt2 PE=1 SV=1	0.163886	0.0384818	0.210802	0.091437	0.362693	0.0644201	0.365597	0.243168
Q9QWL7	22	4	Keratin, type I cytoskeletal 17 OS=Mus musculus OX=10090 GN=Krt17 PE=1 SV=3	0.191691	0.10102	0.045615	0.14544	0.37002	0.151778	0.0889337	0.228821
Q99PS0	4	4	Keratin, type I cytoskeletal 23 OS=Mus musculus OX=10090 GN=Krt23 PE=1 SV=1	1.08812	1.59753	0.696793	1.12914	1.65436	2.5829	1.74994	1.89855
P22599	20	6	Alpha-1-antitrypsin 1-2 OS=Mus musculus OX=10090 GN=Serpina1b PE=1 SV=2	0.356177	0.730921	0.310462	0.493397	0.668171	1.14493	0.464103	0.843874
P07758;Q00896	20	5	Alpha-1-antitrypsin 1-1 OS=Mus musculus OX=10090 GN=Serpina1a PE=1 SV=4	0.41798	0.689183	0.44356	0.631143	0.781592	1.10176	0.798345	1.02794
P01794;P01787;P01788;P01790;P01791	1	1	Ig heavy chain V region HPCG14 OS=Mus musculus OX=10090 PE=1 SV=1	0.173075	0.0725757	0.0831238	0.0942222	0.37327	0.115155	0.185814	0.201633
P03995	6	1	Glial fibrillary acidic protein OS=Mus musculus OX=10090 GN=Gfap PE=1 SV=4	0.40558	0.0449974	0.18309	0.116394	0.950665	0.0645182	0.350637	0.11134
Q921I1	60	54	Serotransferrin OS=Mus musculus OX=10090 GN=Tf PE=1 SV=1	1.21572	1.92659	0.825941	1.57989	1.97874	3.20372	2.05299	2.69269
Q6ZWX6	3	2	Eukaryotic translation initiation factor 2 subunit 1 OS=Mus musculus OX=10090 GN=Eif2s1 PE=1 SV=3	0.111421	0.044503	0.0236078	0.0317049	0.24478	0.0706077	0.0599687	0.0611066
Q8R550	1	1	SH3 domain-containing kinase-binding protein 1 OS=Mus musculus OX=10090 GN=Sh3kbp1 PE=1 SV=1	0.136011	0.0568113	0.0248007	0.058646	0.310854	0.0915282	0.063003	0.158394
P06909	35	25	Complement factor H OS=Mus musculus OX=10090 GN=Cfh PE=1 SV=2	0.308518	0.491182	0.170915	0.363475	0.58625	0.789887	0.392966	0.645595
P08226	18	13	Apolipoprotein E OS=Mus musculus OX=10090 GN=Apoe PE=1 SV=2	0.105385	0.150304	0.10865	0.240702	0.193836	0.24263	0.232588	0.412269
Q91VI7	4	3	Ribonuclease inhibitor OS=Mus musculus OX=10090 GN=Rnh1 PE=1 SV=1	0.244466	0.0687144	0.21985	0.0650796	0.545871	0.10782	0.329776	0.154855
E9PV87	4	1	Protein TALPID3 OS=Mus musculus OX=10090 GN=Talpid3 PE=1 SV=1	0.62293	0.104897	0.050521	0.186251	1.35894	0.154838	0.123325	0.396637
Q91X72	31	29	Hemopexin OS=Mus musculus OX=10090 GN=Hpx PE=1 SV=2	0.994926	1.28482	1.63439	1.03007	1.66393	2.04347	1.77691	1.69725
Q3UV17	28	14	Keratin, type II cytoskeletal 2 oral OS=Mus musculus OX=10090 GN=Krt76 PE=1 SV=1	0.0919403	0.0636452	2.07384	0.0777117	0.169623	0.101031	0.496138	0.128657
P01863;P01865;P84751	16	13	Ig gamma-2A chain C region, A allele OS=Mus musculus OX=10090 GN=Ighg PE=1 SV=1	1.54983	2.4933	0.818379	1.80948	2.21255	4.1122	2.07623	3.00204
Q9JL35	10	8	High mobility group nucleosome-binding domain-containing protein 5 OS=Mus musculus OX=10090 GN=Hmgn5 PE=1 SV=2	0.711347	0.572076	0.467535	0.371477	1.40828	0.889055	0.986166	0.680919
P35821	4	2	Tyrosine-protein phosphatase non-receptor type 1 OS=Mus musculus OX=10090 GN=Ptpn1 PE=1 SV=2	0.191903	0.0946261	0.0434048	0.118911	0.410575	0.149906	0.100991	0.141031
Q9D312	7	3	Keratin, type I cytoskeletal 20 OS=Mus musculus OX=10090 GN=Krt20 PE=1 SV=1	0.189042	0.149891	0.0878225	0.183405	0.348885	0.241293	0.207141	0.251203
P49749	1	1	Homeobox even-skipped homolog protein 2 OS=Mus musculus OX=10090 GN=Evx2 PE=2 SV=1	0.0989694	0.208399	0.0976482	0.20479	0.136216	0.307531	0.186178	0.189319
Q61646	25	23	Haptoglobin OS=Mus musculus OX=10090 GN=Hp PE=1 SV=1	0.596926	1.31105	0.425778	0.875594	0.865259	2.0919	1.06414	1.43649
P06330;P01750;P01756;P01757	6	6	Ig heavy chain V region AC38 205.12 OS=Mus musculus OX=10090 PE=1 SV=1	0.225936	0.32094	0.428536	0.329218	0.416478	0.525158	0.829885	0.611792
Q61704	6	4	Inter-alpha-trypsin inhibitor heavy chain H3 OS=Mus musculus OX=10090 GN=Itih3 PE=1 SV=3	0.0492471	0.019915	0.0028714	0.050172	0.102663	0.0315404	0.0039071	0.0455977
Q9CQ20	1	1	Mid1-interacting protein 1 OS=Mus musculus OX=10090 GN=Mid1ip1 PE=1 SV=1	0.056551	0.0899023	0.0260243	0.036675	0.0943534	0.129905	0.0613978	0.0646236
P07309	8	7	Transthyretin OS=Mus musculus OX=10090 GN=Ttr PE=1 SV=1	0.239809	0.608036	0.24645	0.529152	0.345108	0.991924	0.6097	0.814314
P12246	10	8	Serum amyloid P-component OS=Mus musculus OX=10090 GN=Apcs PE=1 SV=2	0.12492	0.161277	0.147921	0.212068	0.223872	0.266368	0.348686	0.414664
Q6IFZ6	26	15	Keratin, type II cytoskeletal 1b OS=Mus musculus OX=10090 GN=Krt77 PE=1 SV=1	0.231363	0.180458	0.125484	0.198946	0.489619	0.288406	0.254779	0.361987
P35441	11	11	Thrombospondin-1 OS=Mus musculus OX=10090 GN=Thbs1 PE=1 SV=1	0.072921	0.0436823	0.0541182	0.0751271	0.139416	0.0686242	0.10539	0.098016
P05784	5	1	Keratin, type I cytoskeletal 18 OS=Mus musculus OX=10090 GN=Krt18 PE=1 SV=5	0.126196	0.0456969	0.105794	0.0600635	0.280446	0.0702937	0.125762	0.136888
Q9WVF6	1	1	Group IID secretory phospholipase A2 OS=Mus musculus OX=10090 GN=Pla2g2d PE=1 SV=1	0.102642	0.0576539	0.0514366	0.0662579	0.2197	0.0877356	0.130332	0.139588
Q3UHB8	2	1	Coiled-coil domain-containing protein 177 OS=Mus musculus OX=10090 GN=Ccdc177 PE=1 SV=1	0.106348	0.154536	0.073537	0.177586	0.185975	0.249683	0.186601	0.279855
P01837	10	9	Immunoglobulin kappa constant OS=Mus musculus OX=10090 GN=Igkc PE=1 SV=2	0.775204	0.985725	0.639348	1.28763	1.09327	1.58716	1.40995	1.67265
Q9JJN5	6	6	Carboxypeptidase N catalytic chain OS=Mus musculus OX=10090 GN=Cpn1 PE=1 SV=1	0.0507711	0.0484841	0.0200293	0.039097	0.0987329	0.0753899	0.0424136	0.0884833
P39876	7	5	Metalloproteinase inhibitor 3 OS=Mus musculus OX=10090 GN=Timp3 PE=1 SV=1	0.101498	0.155732	0.0281792	0.315782	0.15089	0.237666	0.0646539	0.273232
Q62168	5	3	Keratin, type I cuticular Ha2 OS=Mus musculus OX=10090 GN=Krt32 PE=1 SV=2	0.110955	0.0643351	0.131088	0.600827	0.222873	0.0965858	0.0829073	0.317857
Q60590;P07361	7	7	Alpha-1-acid glycoprotein 1 OS=Mus musculus OX=10090 GN=Orm1 PE=1 SV=1	0.229792	0.295674	0.0493263	0.198932	0.331473	0.461908	0.0673632	0.299407
Q8VCN9	1	1	Tubulin-specific chaperone C OS=Mus musculus OX=10090 GN=Tbcc PE=1 SV=1	0.0513363	0.0175735	0.103511	0.0249887	0.117026	0.0284923	0.190252	0.0685481
A6X935	21	13	Inter alpha-trypsin inhibitor, heavy chain 4 OS=Mus musculus OX=10090 GN=Itih4 PE=1 SV=2	0.139178	0.170968	0.0936947	0.14431	0.251246	0.2817	0.216702	0.263718
Q8VCR3	2	2	Transmembrane protein 242 OS=Mus musculus OX=10090 GN=Tmem242 PE=2 SV=1	0.0278664	0.0829197	0.0161447	0.0601094	0.040737	0.138667	0.0380859	0.0917459
Q61702	9	8	Inter-alpha-trypsin inhibitor heavy chain H1 OS=Mus musculus OX=10090 GN=Itih1 PE=1 SV=2	0.125761	0.0861322	0.017243	0.0599411	0.18047	0.134361	0.0437613	0.0869692
Q06890	11	10	Clusterin OS=Mus musculus OX=10090 GN=Clu PE=1 SV=1	0.0815405	0.0995172	0.0300943	0.139731	0.136528	0.157445	0.0759325	0.153382
Q3UKC1	7	5	Tax1-binding protein 1 homolog OS=Mus musculus OX=10090 GN=Tax1bp1 PE=1 SV=2	0.0468144	0.0149868	0.0233741	0.585046	0.103599	0.0237134	0.0125415	1.14453
Q8BXK9	2	2	Chloride intracellular channel protein 5 OS=Mus musculus OX=10090 GN=Clic5 PE=1 SV=1	0.303616	0.273037	0.142847	0.33886	0.624582	0.438012	0.292025	0.768248
P01942	4	4	Hemoglobin subunit alpha OS=Mus musculus OX=10090 GN=Hba PE=1 SV=2	0.09347	0.309113	0.0690261	0.264049	0.136114	0.497864	0.170347	0.395493
P01878	14	13	Ig alpha chain C region OS=Mus musculus OX=10090 PE=1 SV=1	0.321283	0.476523	0.338289	0.357504	0.477709	0.782393	0.838494	0.659963
Q61838	74	67	Pregnancy zone protein OS=Mus musculus OX=10090 GN=Pzp PE=1 SV=3	0.932798	1.53348	0.349891	1.15027	1.36818	2.44409	0.888191	1.82981
Q6IFX3	5	3	Keratin, type I cytoskeletal 40 OS=Mus musculus OX=10090 GN=Krt40 PE=2 SV=1	0.719756	1.28916	0.309487	0.84938	1.0257	2.09359	0.725692	1.32421
Q9R118	4	2	Serine protease HTRA1 OS=Mus musculus OX=10090 GN=Htra1 PE=1 SV=2	0.0289156	0.00973577	0.0361345	0.0193851	0.0649778	0.0165096	0.0648225	0.0441008
O89020	22	19	Afamin OS=Mus musculus OX=10090 GN=Afm PE=1 SV=2	0.346568	0.737454	0.0301959	0.146381	0.584569	1.03359	0.0740988	0.282749
P97857	4	4	A disintegrin and metalloproteinase with thrombospondin motifs 1 OS=Mus musculus OX=10090 GN=Adamts1 PE=1 SV=4	0.081449	0.0186913	0.312637	0.0355165	0.187052	0.0292537	0.0948878	0.0672852
Q02105	6	4	Complement C1q subcomponent subunit C OS=Mus musculus OX=10090 GN=C1qc PE=1 SV=2	0.0693509	0.0632899	0.5885	0.118754	0.120483	0.100996	1.43165	0.258498
P19221	25	21	Prothrombin OS=Mus musculus OX=10090 GN=F2 PE=1 SV=1	0.211303	0.186813	0.0260489	0.177441	0.328402	0.299687	0.0615957	0.267353
P06728	20	19	Apolipoprotein A-IV OS=Mus musculus OX=10090 GN=Apoa4 PE=1 SV=3	0.185807	0.254379	0.0761417	0.291319	0.301916	0.398139	0.104841	0.380924
Q8K1I3	5	4	Secreted phosphoprotein 24 OS=Mus musculus OX=10090 GN=Spp2 PE=1 SV=2	0.0767749	0.176659	0.247633	0.122845	0.126025	0.290202	0.164404	0.156084
Q8VE92	1	1	RNA-binding protein 4B OS=Mus musculus OX=10090 GN=Rbm4b PE=1 SV=1	0.0871807	0.0463711	0.0586598	0.0666654	0.179416	0.0733734	0.108898	0.150242
P06537	2	2	Glucocorticoid receptor OS=Mus musculus OX=10090 GN=Nr3c1 PE=1 SV=1	0.122799	0.265463	0.0872125	0.183289	0.199683	0.43113	0.221211	0.307742
Q8BHB9	2	2	Chloride intracellular channel protein 6 OS=Mus musculus OX=10090 GN=Clic6 PE=1 SV=1	0.136442	0.266364	0.254285	0.361538	0.206791	0.450869	0.644777	0.607994
P23953;Q8VCC2	19	11	Carboxylesterase 1C OS=Mus musculus OX=10090 GN=Ces1c PE=1 SV=4	0.153265	0.254243	0.267206	0.224071	0.240207	0.415738	0.428747	0.386281
P26262	22	18	Plasma kallikrein OS=Mus musculus OX=10090 GN=Klkb1 PE=1 SV=2	0.150146	0.100326	0.150212	0.103744	0.272188	0.158556	0.146088	0.167957
P41317	5	4	Mannose-binding protein C OS=Mus musculus OX=10090 GN=Mbl2 PE=1 SV=2	0.0745207	0.0402231	0.0601331	0.0560815	0.15172	0.0639497	0.0470062	0.0726282
Q9WV06	3	1	Ankyrin repeat domain-containing protein 2 OS=Mus musculus OX=10090 GN=Ankrd2 PE=1 SV=3	0.143563	0.103522	0.0108205	0.122963	0.299318	0.153629	0.0241567	0.288052
Q6P2L7	3	3	Protein CASC4 OS=Mus musculus OX=10090 GN=Casc4 PE=1 SV=1	0.290928	0.580168	0.193626	0.476408	0.412346	0.906603	0.419008	0.764658
Q6IME9	14	7	Keratin, type II cytoskeletal 72 OS=Mus musculus OX=10090 GN=Krt72 PE=3 SV=1	0.425642	1.27762	0.737121	2.14533	0.592756	2.16155	1.52112	2.32674
P06869	1	1	Urokinase-type plasminogen activator OS=Mus musculus OX=10090 GN=Plau PE=1 SV=1	0.136514	0.115709	0.16672	0.122208	0.208226	0.182718	0.423141	0.259814
P01592	5	4	Immunoglobulin J chain OS=Mus musculus OX=10090 GN=Jchain PE=1 SV=4	0.0962017	0.161122	0.118885	0.242124	0.146025	0.256095	0.293509	0.240975
P43025	6	4	Tetranectin OS=Mus musculus OX=10090 GN=Clec3b PE=1 SV=2	0.0326907	0.0414634	0.00301335	0.0743614	0.0473579	0.0593029	0.0076855	0.124327
O88803	2	2	Leukocyte cell-derived chemotaxin-2 OS=Mus musculus OX=10090 GN=Lect2 PE=1 SV=1	0.0300575	0.0164799	0.00231747	0.0212612	0.0536653	0.0239074	0.00593534	0.0175365
P01869;P01868	15	12	Ig gamma-1 chain C region, membrane-bound form OS=Mus musculus OX=10090 GN=Ighg1 PE=1 SV=2	0.168237	0.371803	0.386418	0.41802	0.259778	0.601031	0.963024	0.56179
P02088;P02104	8	7	Hemoglobin subunit beta-1 OS=Mus musculus OX=10090 GN=Hbb-b1 PE=1 SV=2	0.0687207	0.15985	0.0574401	0.130766	0.116824	0.261647	0.145285	0.196472
P04186	13	12	Complement factor B OS=Mus musculus OX=10090 GN=Cfb PE=1 SV=2	0.15774	0.236791	0.145855	0.213615	0.246122	0.387231	0.233478	0.344373
Q8VCM7	15	11	Fibrinogen gamma chain OS=Mus musculus OX=10090 GN=Fgg PE=1 SV=1	0.0587202	0.132828	4.48877	0.140824	0.119225	0.195733	1.10256	0.171869
P19426	1	1	Negative elongation factor E OS=Mus musculus OX=10090 GN=Nelfe PE=1 SV=2	0.110428	0.0155667	0	0.0186833	0.260074	0.023965	0	0.0274222
Q00897	20	4	Alpha-1-antitrypsin 1-4 OS=Mus musculus OX=10090 GN=Serpina1d PE=1 SV=1	0.0468828	0.0516952	0.0523091	0.174382	0.0936503	0.0815794	0.0652348	0.134586
Q8K0E8	15	14	Fibrinogen beta chain OS=Mus musculus OX=10090 GN=Fgb PE=1 SV=1	0.0755711	0.116023	0.0327859	0.164925	0.120889	0.184419	0.0691183	0.21661
P28665	59	32	Murinoglobulin-1 OS=Mus musculus OX=10090 GN=Mug1 PE=1 SV=3	0.157802	0.318147	0.183495	0.200462	0.235852	0.505432	0.204241	0.341397
P20918	24	19	Plasminogen OS=Mus musculus OX=10090 GN=Plg PE=1 SV=3	0.0464294	0.0729091	0.0253612	0.112607	0.0731935	0.114001	0.0259271	0.143161
Q80YC5	12	8	Coagulation factor XII OS=Mus musculus OX=10090 GN=F12 PE=1 SV=2	0.190219	0.079208	0.126758	0.109425	0.27101	0.118942	0.0716017	0.189938
P18052	3	1	Receptor-type tyrosine-protein phosphatase alpha OS=Mus musculus OX=10090 GN=Ptpra PE=1 SV=3	0.1991	0.569325	0.236774	0.531462	0.295115	0.927276	0.601285	0.861673
P01727;P01723	1	1	Ig lambda-1 chain V region S43 OS=Mus musculus OX=10090 PE=1 SV=1	0.0668212	0.113582	0.0120576	3.26749	0.117893	0.16946	0.0251004	7.86003
P02089	7	4	Hemoglobin subunit beta-2 OS=Mus musculus OX=10090 GN=Hbb-b2 PE=1 SV=2	0.102845	0.23231	0.16937	0.258105	0.167042	0.370909	0.225051	0.371748
Q6GQT1	6	3	Alpha-2-macroglobulin-P OS=Mus musculus OX=10090 GN=A2m PE=2 SV=2	0.0355242	0.0668084	0.00281534	0.11663	0.0525092	0.101235	0.00714149	0.2534
P24369	7	4	Peptidyl-prolyl cis-trans isomerase B OS=Mus musculus OX=10090 GN=Ppib PE=1 SV=2	0.0297311	0.0377041	0.0103925	0.0453763	0.0435732	0.0530229	0.0190633	0.048167
Q03734	17	4	Serine protease inhibitor A3M OS=Mus musculus OX=10090 GN=Serpina3m PE=1 SV=2	0.070549	0.0305204	0.021426	0.04898	0.156831	0.0479606	0.0471829	0.0686548
Q3B7Z2	7	4	Oxysterol-binding protein 1 OS=Mus musculus OX=10090 GN=Osbp PE=1 SV=3	0.0531918	0.0378623	0.0245452	0.252116	0.0947854	0.063266	0.0396567	0.14744
Q61129	8	7	Complement factor I OS=Mus musculus OX=10090 GN=Cfi PE=1 SV=3	0.0383783	0.0664869	0.0461923	0.0583525	0.0575261	0.107722	0.0381008	0.0760479
P19246	7	3	Neurofilament heavy polypeptide OS=Mus musculus OX=10090 GN=Nefh PE=1 SV=3	0.0445544	0.0214658	0.150655	0.10843	0.0911357	0.0322713	0.367221	0.0587116
P63260;P60710;P62737;P63268;P68033;P68134	5	1	Actin, cytoplasmic 2 OS=Mus musculus OX=10090 GN=Actg1 PE=1 SV=1	0.029232	0.0583426	0.00909263	0.123553	0.0421229	0.0906577	0.02307	0.0781025
Q91WP6;Q80X76	14	5	Serine protease inhibitor A3N OS=Mus musculus OX=10090 GN=Serpina3n PE=1 SV=1	0.209488	0.389767	0.180045	0.241766	0.298928	0.664564	0.383421	0.390492
E9Q286	6	4	Little elongation complex subunit 1 OS=Mus musculus OX=10090 GN=Ice1 PE=1 SV=1	0.0616758	0.0904995	0.00507508	0.109845	0.0866845	0.152279	0.0128186	0.155952
Q6P6J9	1	1	Thioredoxin domain-containing protein 15 OS=Mus musculus OX=10090 GN=Txndc15 PE=1 SV=1	0.000748993	0.000556357	0	0.000825497	0.00103675	0.000762104	0	0.00115288
Q922G7	2	2	Tektin-2 OS=Mus musculus OX=10090 GN=Tekt2 PE=1 SV=1	0.0481736	0.0243961	0.0519305	0.0222738	0.0989564	0.0363258	0.0222821	0.0507539
A1L317	9	7	Keratin, type I cytoskeletal 24 OS=Mus musculus OX=10090 GN=Krt24 PE=2 SV=2	0.142285	0.289047	0.0679996	0.160744	0.206856	0.453683	0.152036	0.244017
P03987	11	9	Ig gamma-3 chain C region OS=Mus musculus OX=10090 PE=1 SV=2	0.0749367	0.107415	0.0724205	0.223752	0.114751	0.174924	0.18363	0.20539
P13020	12	9	Gelsolin OS=Mus musculus OX=10090 GN=Gsn PE=1 SV=3	0.012656	0.0242689	1.01188	0.0246978	0.0198874	0.0382461	0.304447	0.036344
P11679	11	4	Keratin, type II cytoskeletal 8 OS=Mus musculus OX=10090 GN=Krt8 PE=1 SV=4	0.0200569	0.0200796	0.0107035	0.0535223	0.0358027	0.0324579	0.0210992	0.0928026
P97290	3	3	Plasma protease C1 inhibitor OS=Mus musculus OX=10090 GN=Serping1 PE=1 SV=3	0.046498	0.0681574	0.0232358	0.155739	0.0707095	0.109318	0.0589276	0.145163
P18528	4	4	Ig heavy chain V region 6.96 OS=Mus musculus OX=10090 PE=4 SV=1	0.071891	0.134691	0.0959702	2.06309	0.107359	0.219785	0.231435	4.63867
Q8VCT4	11	7	Carboxylesterase 1D OS=Mus musculus OX=10090 GN=Ces1d PE=1 SV=1	0.0398058	0.0836835	0.0238067	0.109423	0.0587401	0.136095	0.0548459	0.139449
Q8VE37	2	2	Regulator of chromosome condensation OS=Mus musculus OX=10090 GN=Rcc1 PE=1 SV=1	0.0643101	0.0856445	0.0675007	0.0800937	0.0903542	0.133549	0.160188	0.119211
A2ATD1	2	1	Isthmin-1 OS=Mus musculus OX=10090 GN=Ism1 PE=1 SV=1	0.144819	0.288376	0.151583	0.18317	0.224912	0.456258	0.183127	0.277265
Q497I4	13	5	Keratin, type I cuticular Ha5 OS=Mus musculus OX=10090 GN=Krt35 PE=1 SV=1	0.1056	0.196793	0.0837777	0.25764	0.162291	0.316971	0.190937	0.265176
Q8VCW2	5	3	Keratin, type I cytoskeletal 25 OS=Mus musculus OX=10090 GN=Krt25 PE=1 SV=1	0.0060756	0.0034174	0.0901442	0.0120863	0.012108	0.00567363	0.0225482	0.0143186
P46414	1	1	Cyclin-dependent kinase inhibitor 1B OS=Mus musculus OX=10090 GN=Cdkn1b PE=1 SV=2	0.0216997	0.0293761	0.0123455	0.0323614	0.0344774	0.0502316	0.0313154	0.0598712
P01844;P01845	5	4	Ig lambda-2 chain C region OS=Mus musculus OX=10090 GN=Iglc2 PE=1 SV=1	0.0359417	0.0423051	0.017049	1.11404	0.0544975	0.0688025	0.0431614	1.36907
Q810N9	3	2	Coiled-coil domain-containing protein 172 OS=Mus musculus OX=10090 GN=Ccdc172 PE=1 SV=1	0.152457	0.279361	0.246845	0.260374	0.21292	0.455722	0.172833	0.364524
P01747;P01746	2	2	Ig heavy chain V region 36-65 OS=Mus musculus OX=10090 PE=1 SV=1	0.0425714	0.0701408	0.0421677	0.0600103	0.0623411	0.114224	0.104735	0.112352
Q8CCX5	2	1	Keratin-like protein KRT222 OS=Mus musculus OX=10090 GN=Krt222 PE=2 SV=1	0.00241665	0.00126897	0.00110772	1.76236	0.00480417	0.00197261	0.00196661	0.501879
P52430	4	2	Serum paraoxonase/arylesterase 1 OS=Mus musculus OX=10090 GN=Pon1 PE=1 SV=2	0.0194994	0.0256376	0.0134637	0.0203419	0.0289771	0.0416116	0.0340811	0.0385447
Q9QWK4	11	7	CD5 antigen-like OS=Mus musculus OX=10090 GN=Cd5l PE=1 SV=3	0.0487836	0.0497082	0.0296665	0.0356002	0.0771456	0.0752474	0.0733505	0.0724475
Q61805	2	2	Lipopolysaccharide-binding protein OS=Mus musculus OX=10090 GN=Lbp PE=1 SV=2	0.0358567	0.0388003	0.0536781	0.0850124	0.0512551	0.0581541	0.136247	0.055656
Q9CSN1	6	2	SNW domain-containing protein 1 OS=Mus musculus OX=10090 GN=Snw1 PE=1 SV=3	0.0592064	0.0941273	0.00330156	0.0808401	0.0836592	0.145264	0.00457815	0.116681
Q9D8L0	2	2	Uncharacterized protein C11orf52 homolog OS=Mus musculus OX=10090 PE=2 SV=1	0.0666959	0.137978	0.285792	0.112013	0.0917098	0.22564	0.0807597	0.165978
P49138	2	1	MAP kinase-activated protein kinase 2 OS=Mus musculus OX=10090 GN=Mapkapk2 PE=1 SV=2	0.0150541	0.0409566	0.0531799	0.024724	0.0207029	0.0682455	0.0101884	0.0268411
Q80U56	2	2	Late secretory pathway protein AVL9 homolog OS=Mus musculus OX=10090 GN=Avl9 PE=1 SV=2	0.0216793	0.0571239	0.0712152	0.0501288	0.0323229	0.0895884	0.0993097	0.0818033
P01631	6	6	Ig kappa chain V-II region 26-10 OS=Mus musculus OX=10090 PE=1 SV=1	0.0696137	0.1144	0.0803581	0.093385	0.0971919	0.185869	0.203179	0.159511
O55233	3	2	Cerberus OS=Mus musculus OX=10090 GN=Cer1 PE=1 SV=1	0.0595812	0.0108174	0.00890526	0.0117363	0.138255	0.0178613	0.0225884	0.026995
P01864	7	5	Ig gamma-2A chain C region secreted form OS=Mus musculus OX=10090 PE=1 SV=1	0.100063	0.241236	0.0972853	0.177083	0.140678	0.397484	0.246867	0.296231
Q8R2S9	3	3	Actin-related protein 8 OS=Mus musculus OX=10090 GN=Actr8 PE=2 SV=1	0.0264475	0.0179585	0.00109558	0.0257547	0.0369934	0.0280749	0.00276774	0.0285079
Q61703	14	13	Inter-alpha-trypsin inhibitor heavy chain H2 OS=Mus musculus OX=10090 GN=Itih2 PE=1 SV=1	0.0695524	0.0667664	0.0119343	0.0627032	0.118995	0.102748	0.0303551	0.0931568
P29621	10	3	Serine protease inhibitor A3C OS=Mus musculus OX=10090 GN=Serpina3c PE=2 SV=1	0.00905311	0.00828377	0.000638751	0.0798383	0.0170372	0.0122394	0.00161855	0.0354506
Q8CE08	1	1	Prostatic acid phosphatase OS=Mus musculus OX=10090 GN=Acpp PE=2 SV=1	0.0359643	0.0617018	0.0431195	0.0488763	0.0505856	0.100947	0.105999	0.0900435
P11477	1	1	Alpha-defensin 1 OS=Mus musculus OX=10090 GN=Defa1 PE=1 SV=2	0.177435	0.0668195	0.000184079	0.032656	0.244863	0.0899194	0.000481826	0.0272068
P01898;P01899;P01901;P03991;P04223;P14428;P14429;P14430	11	9	H-2 class I histocompatibility antigen, Q10 alpha chain OS=Mus musculus OX=10090 GN=H2-Q10 PE=1 SV=3	0.0266944	0.0625344	0.0181144	0.051792	0.0376351	0.0976396	0.0450844	0.0862274
Q9D2A5	2	1	Cyclic AMP-responsive element-binding protein 3-like protein 4 OS=Mus musculus OX=10090 GN=Creb3l4 PE=1 SV=1	0.0526863	0.0988087	0.00020279	0.0373469	0.0724742	0.158227	0.000498357	0.0490212
Q01339	7	5	Beta-2-glycoprotein 1 OS=Mus musculus OX=10090 GN=Apoh PE=1 SV=1	0.0789375	0.104614	0.0354267	0.101862	0.110329	0.166609	0.0898496	0.177575
Q00898	11	2	Alpha-1-antitrypsin 1-5 OS=Mus musculus OX=10090 GN=Serpina1e PE=1 SV=1	0.00658712	0.00515854	0.00232786	0.0390657	0.0118908	0.00783702	0.0048186	0.0205848
Q06770	8	7	Corticosteroid-binding globulin OS=Mus musculus OX=10090 GN=Serpina6 PE=1 SV=1	0.0419426	0.0739901	0.0153852	0.0643997	0.0638538	0.117523	0.0352875	0.0866141
Q9D7M1	2	2	Glucose-induced degradation protein 8 homolog OS=Mus musculus OX=10090 GN=Gid8 PE=1 SV=1	0.0201388	0.0351397	0.000398128	0.0432078	0.0278844	0.0546545	0.000994762	0.0339736
B1AQ75	9	4	Keratin, type I cuticular Ha6 OS=Mus musculus OX=10090 GN=Krt36 PE=1 SV=1	0.0167817	0.028226	0.0118272	0.0350913	0.0262363	0.0430459	0.00291435	0.0215657
Q3UZV7	3	2	UPF0577 protein KIAA1324-like homolog OS=Mus musculus OX=10090 PE=1 SV=1	0.00674112	0.00706292	0	0.0151532	0.00927264	0.0108395	0	0.0146402
Q3TC72	2	1	Fumarylacetoacetate hydrolase domain-containing protein 2A OS=Mus musculus OX=10090 GN=Fahd2 PE=1 SV=1	0.0268351	0.00579549	0.00451194	0.00830668	0.0620355	0.00882519	0.0113582	0.0227752
Q8BKK4	1	1	Protein phosphatase 1 regulatory subunit 1C OS=Mus musculus OX=10090 GN=Ppp1r1c PE=3 SV=1	0.00339176	0.0132016	0.000258126	0.00488699	0.00747906	0.0217047	0.000654331	0.00767887
Q07456	9	8	Protein AMBP OS=Mus musculus OX=10090 GN=Ambp PE=1 SV=2	0.0607625	0.158099	0.062528	0.227933	0.0845913	0.271799	0.154001	0.492544
P01796;P01797;P01798;P01799;P01801;P01803;P01804	2	2	Ig heavy chain V-III region A4 OS=Mus musculus OX=10090 PE=1 SV=1	0.0134052	0.0264191	0.014801	0.021713	0.0184591	0.0433197	0.0374687	0.0396477
Q7TN22	2	2	Thioredoxin domain-containing protein 16 OS=Mus musculus OX=10090 GN=Txndc16 PE=2 SV=1	0.0205018	0.0338495	0.000128535	0.032584	0.0282623	0.0557779	0.000315875	0.0473085
E9PV24	5	4	Fibrinogen alpha chain OS=Mus musculus OX=10090 GN=Fga PE=1 SV=1	0.0374798	0.0581515	0.0339176	0.0445362	0.0676512	0.0975935	0.02711	0.0573207
Q791N7	1	1	DNA-directed RNA polymerase I subunit RPA12 OS=Mus musculus OX=10090 GN=Znrd1 PE=1 SV=1	0.168986	0.308077	0.0787684	0.271206	0.232462	0.496636	0.199799	0.459343
Q9DBD0	5	5	Inhibitor of carbonic anhydrase OS=Mus musculus OX=10090 GN=Ica PE=1 SV=1	0.0196076	0.032559	0.0573612	0.0166097	0.0272081	0.0525962	0.0109168	0.0229597
Q07235	3	2	Glia-derived nexin OS=Mus musculus OX=10090 GN=Serpine2 PE=1 SV=2	0.0301118	0.00815083	0	0.0104582	0.0414183	0.0114692	0	0.0205076
P40336	2	2	Vacuolar protein sorting-associated protein 26A OS=Mus musculus OX=10090 GN=Vps26a PE=1 SV=1	0.0862499	0.0615788	0.00342474	0.0708762	0.118805	0.0953205	0.00871283	0.100084
Q9D3R9	2	2	Transcription initiation factor TFIID subunit 7-like OS=Mus musculus OX=10090 GN=Taf7l PE=1 SV=2	0.00755956	0.0206277	0.00250534	0.044964	0.0106603	0.0344529	0.00635224	0.0309882
P43137	1	1	Lithostathine-1 OS=Mus musculus OX=10090 GN=Reg1 PE=1 SV=1	0.000607355	0.00270756	0	0.00125875	0.000833265	0.00371548	0	0.00177877
Q5I2A0	6	1	Serine protease inhibitor A3G OS=Mus musculus OX=10090 GN=Serpina3g PE=1 SV=2	0.00185824	0.0046362	0.000321188	0.00550237	0.002589	0.00720489	0.000806899	0.00522158
O35684	2	2	Neuroserpin OS=Mus musculus OX=10090 GN=Serpini1 PE=1 SV=1	0.00807226	0.0164176	1.7049e-05	0.0101517	0.0112459	0.0221948	4.31175e-05	0.0135871
Q61765	4	2	Keratin, type I cuticular Ha1 OS=Mus musculus OX=10090 GN=Krt31 PE=1 SV=2	0.00178928	0.00696754	0.000790151	0.000573257	0.00249201	0.00943046	0.000300427	0.000787854
O88947	3	1	Coagulation factor X OS=Mus musculus OX=10090 GN=F10 PE=1 SV=1	0.00449784	0.00795692	0.000995484	0.0622344	0.0061897	0.0119012	0.00233898	0.127908
P01655;P01654	2	1	Ig kappa chain V-III region PC 7132 OS=Mus musculus OX=10090 PE=1 SV=1	0.000738603	0.0011102	0	0.00300042	0.00100983	0.00169877	0	0.00358228
P50428	1	1	Arylsulfatase A OS=Mus musculus OX=10090 GN=Arsa PE=1 SV=2	0.0068639	0.0188361	0	0.0135463	0.00942379	0.0311129	0	0.0192019
Q9CRA0	1	1	Ecto-ADP-ribosyltransferase 4 OS=Mus musculus OX=10090 GN=Art4 PE=1 SV=1	0.13103	0.109614	0.0107983	0.0545851	0.180296	0.166016	0.0273552	0.10037
P01634	2	1	Ig kappa chain V-V region MOPC 21 OS=Mus musculus OX=10090 PE=1 SV=1	0.00351224	0.00871098	0.00279908	0.195721	0.00488382	0.0135016	0.00690726	0.0624566
P01635	2	1	Ig kappa chain V-V region K2 (Fragment) OS=Mus musculus OX=10090 PE=1 SV=1	0.0120165	0.0296078	0.00175813	0.148145	0.0165187	0.0460973	0.00450756	0.073846
Q91VE6	2	2	MKI67 FHA domain-interacting nucleolar phosphoprotein OS=Mus musculus OX=10090 GN=Nifk PE=1 SV=1	0.0586136	0.23139	0.00170487	0.0543582	0.0805159	0.323405	0.00434324	0.0481935
Q62082	1	1	Myosin regulatory light chain 10 OS=Mus musculus OX=10090 GN=Myl10 PE=2 SV=1	0.00920352	0.0224531	0.00148644	0.0142951	0.0128828	0.0385183	0.00382789	0.0223138
A2ADF7	1	1	Solute carrier family 25 member 34 OS=Mus musculus OX=10090 GN=Slc25a34 PE=1 SV=1	0.111193	0.00426679	0	0.0103276	0.264916	0.0057984	0	0.0222835
Q80VD1	1	1	Protein FAM98B OS=Mus musculus OX=10090 GN=Fam98b PE=1 SV=1	0.0472996	0.0742556	0.0261972	0.023273	0.0655333	0.115776	0.0685712	0.0524655
P97808	2	1	FXYD domain-containing ion transport regulator 5 OS=Mus musculus OX=10090 GN=Fxyd5 PE=1 SV=3	0.00520621	0.0173461	0	0.00842334	0.00711579	0.0296202	0	0.0119209
P97760	1	1	DNA-directed RNA polymerase II subunit RPB3 OS=Mus musculus OX=10090 GN=Polr2c PE=1 SV=2	0.0170736	0.0342182	0.0106041	0.0290871	0.0234957	0.0562742	0.0269364	0.0464655
Q8BFX1	1	1	E3 ubiquitin-protein ligase RNF187 OS=Mus musculus OX=10090 GN=Rnf187 PE=1 SV=2	0.00386033	0.00838904	0.00148693	0.00311078	0.00535487	0.0139808	0.00383865	0.00486273
P01668;P01656;P01660;P01664;P01665;P01666;P01667;P01669;P03977	2	1	Ig kappa chain V-III region PC 7210 OS=Mus musculus OX=10090 PE=1 SV=1	0.0170866	0.0283731	0.0156433	0.0194093	0.0236201	0.0451432	0.0396986	0.0310373
P15535	1	1	Beta-1,4-galactosyltransferase 1 OS=Mus musculus OX=10090 GN=B4galt1 PE=1 SV=1	0.000157844	0.000383392	0.000486236	0.0354873	0.000226268	0.000532316	0.00123459	0.0104893
Q9Z319	3	2	Atrial natriuretic peptide-converting enzyme OS=Mus musculus OX=10090 GN=Corin PE=2 SV=2	0.00762809	0.00997768	0.00582147	0.0636727	0.0105396	0.0150619	0.00654717	0.202539
Q69ZP3	2	1	Probable hydrolase PNKD OS=Mus musculus OX=10090 GN=Pnkd PE=1 SV=2	0.000395185	0.00424847	0	0.0054776	0.000545615	0.00781959	0	0.00776056
Q9QXC1	4	3	Fetuin-B OS=Mus musculus OX=10090 GN=Fetub PE=1 SV=1	0.0200574	0.0419824	0.00129285	0.0311787	0.0276583	0.0703168	0.0032804	0.0450346
Q64726	2	1	Zinc-alpha-2-glycoprotein OS=Mus musculus OX=10090 GN=Azgp1 PE=1 SV=2	0.00154675	0.008094	0	0.00214999	0.00212185	0.0150271	0	0.00300434
Q99N28	2	2	Cell adhesion molecule 3 OS=Mus musculus OX=10090 GN=Cadm3 PE=1 SV=1	0.00710798	0.0165454	2.72701e-05	0.01355	0.00977575	0.0264614	6.91277e-05	0.0194889
P56371	2	2	Ras-related protein Rab-4A OS=Mus musculus OX=10090 GN=Rab4a PE=1 SV=2	0.00284342	0.00762306	0.000148625	0.00802772	0.0039137	0.0132563	0.000365246	0.0128517
P01663;P01662	2	1	Ig kappa chain V-III region PC 4050 OS=Mus musculus OX=10090 PE=1 SV=1	0.00198002	0.00669972	0.000117177	0.0470006	0.00272127	0.0117856	0.000297034	0.0175797
Q9JM90	2	1	Signal-transducing adaptor protein 1 OS=Mus musculus OX=10090 GN=Stap1 PE=1 SV=1	0.00190706	0.0185671	0.000931241	0.0233603	0.00263782	0.0280683	0.00228853	0.0323024
Q99KJ0	1	1	UBX domain-containing protein 2A OS=Mus musculus OX=10090 GN=Ubxn2a PE=1 SV=1	0.00208009	0.0372263	0	0.0233314	0.00285885	0.0684196	0	0.0329797
Q8BXG3	1	1	Intraflagellar transport protein 57 homolog OS=Mus musculus OX=10090 GN=Ift57 PE=1 SV=1	0.0140491	0.0227587	0.000248122	0.0151415	0.0193593	0.0355254	0.000609761	0.0185827
O35615	1	1	Zinc finger protein ZFPM1 OS=Mus musculus OX=10090 GN=Zfpm1 PE=1 SV=1	0.00172142	0.00192648	0	5.07951e-05	0.0023791	0.00254368	0	7.06297e-05
Q8CFG9;Q8CG16	1	1	Complement C1r-B subcomponent OS=Mus musculus OX=10090 GN=C1rb PE=2 SV=1	0.00466173	0.00919948	0	0.0149737	0.00639701	0.0154303	0	0.0121668
P01647	2	1	Ig kappa chain V-V region HP 124E1 OS=Mus musculus OX=10090 PE=1 SV=1	0.00594474	0.0016941	0	0.00737164	0.00816587	0.00292841	0	0.0104548
P03953	1	1	Complement factor D OS=Mus musculus OX=10090 GN=Cfd PE=1 SV=1	0.0129491	0.00787475	0	0.00792421	0.0178145	0.0122287	0	0.0112311
Q8R368	1	1	Dynein assembly factor 4, axonemal OS=Mus musculus OX=10090 GN=Dnaaf4 PE=1 SV=2	0	0	0	0.177592	0	0	0	0.050357
P01636	1	1	Ig kappa chain V-V region MOPC 149 OS=Mus musculus OX=10090 PE=1 SV=1	0.00544338	0.00858999	0	0.0111732	0.00748519	0.0142284	0	0.0138274
P01843	5	4	Ig lambda-1 chain C region OS=Mus musculus OX=10090 PE=1 SV=1	0.021051	0.0245311	0.0157736	0.0972183	0.0289559	0.0406986	0.02486	0.0506652
P01896	2	1	H-2 class I histocompatibility antigen, alpha chain (Fragment) OS=Mus musculus OX=10090 PE=2 SV=1	0.0279688	0.0867081	0.00415837	0.039855	0.0384913	0.151435	0.0105339	0.0570136
P01633	2	1	Ig kappa chain V19-17 OS=Mus musculus OX=10090 GN=Igk-V19-17 PE=1 SV=1	0	0.00231272	0.000330033	0.00477722	0	0.00438556	0.000811056	0.0065916
Q7TN02	1	1	Mediator of RNA polymerase II transcription subunit 26 OS=Mus musculus OX=10090 GN=Med26 PE=1 SV=1	0.00351451	0.0226424	0	0.0178908	0.00481845	0.0407694	0	0.0252625

## Sheet: Copper-free click chemistry
				Amount in %				Amount in fmol
Accession	Peptide count	Unique peptides	Description	Nanocarrier (same for both strategies)	DBCO conjugate	CD11c conjugate	Isotype conjugate	Nanocarrier (same for both strategies)	DBCO conjugate	CD11c conjugate	Isotype conjugate
Q9Z126	4	4	Platelet factor 4	1.26237	9.24727	3.93139	4.60054	2.26963	11.936	7.11931	7.01005
Q9JM99	29	27	Proteoglycan 4	1.83466	2.83339	2.12471	2.4228	4.05819	4.02725	4.01687	3.85255
P80316	1	1	T-complex protein 1 subunit epsilon	5.80799	4.70702	2.32065	2.96095	13.6323	6.17886	3.20973	6.02416
P32261	25	23	Antithrombin-III	0.764789	2.34176	0.598102	0.827875	1.68451	3.23696	1.22176	1.38142
Q91XD6	1	1	Vacuolar protein-sorting-associated protein 36	1.78186	2.67126	0.926939	1.45415	4.08248	3.63417	1.62116	2.35789
P01027	89	78	Complement C3 OS=Mus musculus OX=10090 GN=C3 PE=1 SV=3	1.1566	1.97677	3.43552	5.28819	2.49043	2.97905	5.02615	7.86736
P07744	18	8	Keratin, type II cytoskeletal 4 OS=Mus musculus OX=10090 GN=Krt4 PE=1 SV=2	1.57462	1.6305	1.69782	2.17601	2.85886	2.39857	3.59421	4.03854
P07724	65	63	Serum albumin OS=Mus musculus OX=10090 GN=Alb PE=1 SV=3	17.0592	3.22949	15.1416	13.5826	24.2477	4.17284	34.8476	30.3882
P04104	31	21	Keratin, type II cytoskeletal 1 OS=Mus musculus OX=10090 GN=Krt1 PE=1 SV=4	2.04264	2.2671	0.810709	1.57705	4.80187	3.03907	1.37408	2.70983
Q9Z2T6	11	7	Keratin, type II cuticular Hb5 OS=Mus musculus OX=10090 GN=Krt85 PE=1 SV=2	1.33506	1.66592	0.586404	0.705138	2.97571	2.48514	1.18279	1.54703
P01029	32	26	Complement C4-B OS=Mus musculus OX=10090 GN=C4b PE=1 SV=3	2.46735	2.76451	1.32819	1.76908	5.60026	3.61997	2.12153	3.45393
Q8VCC6	3	3	Cerebral cavernous malformations 2 protein-like OS=Mus musculus OX=10090 GN=Ccm2l PE=2 SV=2	1.08037	1.48022	1.32573	3.32508	2.35346	2.24993	2.60591	4.19797
Q61147	43	32	Ceruloplasmin OS=Mus musculus OX=10090 GN=Cp PE=1 SV=2	3.00167	2.76978	1.53741	2.07911	6.79902	3.73347	2.70059	3.68912
Q8VEG4	1	1	Exonuclease 3'-5' domain-containing protein 2 OS=Mus musculus OX=10090 GN=Exd2 PE=1 SV=2	1.27494	2.21507	0.50988	0.609903	2.97235	2.92135	0.811041	1.16717
Q3UZ39	2	1	Leucine-rich repeat flightless-interacting protein 1 OS=Mus musculus OX=10090 GN=Lrrfip1 PE=1 SV=2	0.98563	1.13506	0.395866	1.04282	2.27371	1.81448	0.760478	1.65204
Q6IFZ9	18	10	Keratin, type II cytoskeletal 74 OS=Mus musculus OX=10090 GN=Krt74 PE=3 SV=1	1.92849	1.80611	2.56591	2.21794	4.11201	2.41201	3.95163	4.01863
Q9Z331;Q99M73	34	5	Keratin, type II cytoskeletal 6B OS=Mus musculus OX=10090 GN=Krt6b PE=1 SV=3	2.60016	2.62415	1.82351	2.06167	5.27078	3.34879	3.68998	4.16606
Q9Z0Y2	1	1	Phospholipase A2 OS=Mus musculus OX=10090 GN=Pla2g1b PE=1 SV=1	0.304687	1.00549	0.202575	0.337166	0.715144	1.46983	0.402596	0.776002
P02535	23	15	Keratin, type I cytoskeletal 10 OS=Mus musculus OX=10090 GN=Krt10 PE=1 SV=3	1.361	1.46169	0.576932	0.89233	3.13741	2.04693	1.09481	1.48036
P01629	1	1	Ig kappa chain V-II region 2S1.3 OS=Mus musculus OX=10090 PE=1 SV=1	0.115308	1.18775	0.162228	0.176391	0.194664	1.34807	0.303046	0.308919
Q6SJQ7	3	2	CMRF35-like molecule 1 OS=Mus musculus OX=10090 GN=Cd300lf PE=1 SV=1	0.228476	0.919644	0.15915	0.175112	0.531995	1.3295	0.345196	0.377192
P29788	20	17	Vitronectin OS=Mus musculus OX=10090 GN=Vtn PE=1 SV=2	1.28013	2.44083	1.18662	1.04105	2.04671	3.17188	1.90487	1.62389
Q8VED5	16	7	Keratin, type II cytoskeletal 79 OS=Mus musculus OX=10090 GN=Krt79 PE=1 SV=2	0.905848	1.51668	0.770692	0.723368	2.10173	2.0148	1.48213	1.33413
Q6NZE7	2	1	Protein FAM122B OS=Mus musculus OX=10090 GN=Fam122b PE=1 SV=2	1.11873	0.808234	8.11803	0.809434	2.40789	1.25376	9.53945	1.42306
Q9Z320	2	1	Keratin, type I cytoskeletal 27 OS=Mus musculus OX=10090 GN=Krt27 PE=1 SV=1	1.21431	1.21472	0.427747	0.619061	2.84528	1.65636	0.689778	1.2116
O54887	2	2	Testis-specific serine kinase substrate OS=Mus musculus OX=10090 GN=Tsks PE=1 SV=4	0.118352	0.732083	0.0370325	0.166821	0.263884	1.05852	0.0756061	0.367843
P69566	3	2	Ran-binding protein 9 OS=Mus musculus OX=10090 GN=Ranbp9 PE=1 SV=1	0.274526	0.550079	0.2706	0.162538	0.642877	0.918805	0.624739	0.356659
Q3TTY5	25	16	Keratin, type II cytoskeletal 2 epidermal OS=Mus musculus OX=10090 GN=Krt2 PE=1 SV=1	1.47657	1.64477	0.602566	1.35525	2.80123	2.08264	1.01407	2.18555
O08677	24	18	Kininogen-1 OS=Mus musculus OX=10090 GN=Kng1 PE=1 SV=1	1.78903	1.64922	0.968598	1.4732	3.83291	2.19551	1.66272	2.56776
Q9ESB3	29	25	Histidine-rich glycoprotein OS=Mus musculus OX=10090 GN=Hrg PE=1 SV=2	1.55435	1.44453	2.05418	1.07998	2.41516	1.92929	4.20004	2.2316
Q05722	2	2	Collagen alpha-1(IX) chain OS=Mus musculus OX=10090 GN=Col9a1 PE=2 SV=2	0.992299	0.770179	0.545536	0.619117	2.16338	1.09073	0.926342	1.14705
Q9R0H5	19	8	Keratin, type II cytoskeletal 71 OS=Mus musculus OX=10090 GN=Krt71 PE=1 SV=1	1.27591	0.93529	0.61745	1.0671	2.99375	1.27481	0.955113	1.85523
P01867	16	15	Ig gamma-2B chain C region OS=Mus musculus OX=10090 GN=Igh-3 PE=1 SV=3	0.904182	0.771564	1.06489	1.16711	1.43258	1.04347	2.18626	2.15996
P01872	22	20	Immunoglobulin heavy constant mu OS=Mus musculus OX=10090 GN=Ighm PE=1 SV=2	0.70271	1.1991	0.965375	0.690285	1.15678	1.55185	1.83286	1.27368
P07759	22	13	Serine protease inhibitor A3K OS=Mus musculus OX=10090 GN=Serpina3k PE=1 SV=2	1.12013	0.935713	0.661491	0.768279	2.4101	1.26283	1.19447	1.54299
Q8CIN4	2	1	Serine/threonine-protein kinase PAK 2 OS=Mus musculus OX=10090 GN=Pak2 PE=1 SV=1	0.333729	1.57228	1.12163	1.0097	0.601605	2.03394	2.21709	1.54455
P29699	11	9	Alpha-2-HS-glycoprotein OS=Mus musculus OX=10090 GN=Ahsg PE=1 SV=1	0.485772	0.527622	0.67528	0.465327	0.971244	0.790708	1.15425	0.836449
P08730	17	5	Keratin, type I cytoskeletal 13 OS=Mus musculus OX=10090 GN=Krt13 PE=1 SV=2	0.740683	0.748164	0.477965	0.909711	1.60856	1.00838	0.915863	1.56423
Q922U2	34	15	Keratin, type II cytoskeletal 5 OS=Mus musculus OX=10090 GN=Krt5 PE=1 SV=1	0.784448	0.931187	0.397419	1.18828	1.81803	1.19935	0.655289	1.993
Q61897;Q9D646	7	3	Keratin, type I cuticular Ha3-II OS=Mus musculus OX=10090 GN=Krt33b PE=1 SV=2	0.112625	0.387713	0.333149	0.142372	0.225448	0.564512	0.480982	0.282122
P28666	54	28	Murinoglobulin-2 OS=Mus musculus OX=10090 GN=Mug2 PE=1 SV=2	0.528803	0.589935	0.344032	0.331611	0.988122	0.833225	0.69476	0.685466
Q6IFX2	29	13	Keratin, type I cytoskeletal 42 OS=Mus musculus OX=10090 GN=Krt42 PE=1 SV=1	0.767162	0.538877	0.744677	0.765574	1.19857	0.742219	1.63355	1.73747
P11276	59	49	Fibronectin OS=Mus musculus OX=10090 GN=Fn1 PE=1 SV=4	0.650242	0.666313	0.435726	0.43403	1.2319	0.903922	0.808124	0.789956
Q9DCV7	12	5	Keratin, type II cytoskeletal 7 OS=Mus musculus OX=10090 GN=Krt7 PE=1 SV=1	0.485543	0.697554	0.18696	0.30333	1.10882	0.884719	0.310527	0.615464
P63157	2	1	BarH-like 1 homeobox protein OS=Mus musculus OX=10090 GN=Barhl1 PE=2 SV=1	0.330665	0.539915	0.266278	0.288089	0.732814	0.730041	0.460173	0.50627
Q00623	28	25	Apolipoprotein A-I OS=Mus musculus OX=10090 GN=Apoa1 PE=1 SV=2	0.475539	0.580867	0.522562	0.564751	0.862584	0.792611	0.891491	1.04297
Q61247	7	7	Alpha-2-antiplasmin OS=Mus musculus OX=10090 GN=Serpinf2 PE=1 SV=1	0.696198	0.619641	1.43211	0.971877	1.38686	0.798624	2.04092	1.556
P14106	8	7	Complement C1q subcomponent subunit B OS=Mus musculus OX=10090 GN=C1qb PE=1 SV=2	0.234337	0.469346	0.319211	0.204522	0.423195	0.686394	0.567117	0.352261
Q812A3	3	3	Ankyrin repeat domain-containing protein 23 OS=Mus musculus OX=10090 GN=Ankrd23 PE=2 SV=1	0.130338	0.295555	0.177234	0.124477	0.294112	0.492246	0.343184	0.282163
Q3UVG3	2	1	Protein FAM91A1 OS=Mus musculus OX=10090 GN=Fam91a1 PE=1 SV=1	0.494321	0.656345	0.281136	0.317209	1.07469	0.849313	0.460228	0.561642
P19001	22	6	Keratin, type I cytoskeletal 19 OS=Mus musculus OX=10090 GN=Krt19 PE=1 SV=1	0.333713	0.459191	0.708444	0.493925	0.748095	0.63505	1.00622	0.812475
Q61781	35	10	Keratin, type I cytoskeletal 14 OS=Mus musculus OX=10090 GN=Krt14 PE=1 SV=2	0.30217	0.423674	0.749456	0.216706	0.688636	0.548993	0.992026	0.384042
P21614	27	24	Vitamin D-binding protein OS=Mus musculus OX=10090 GN=Gc PE=1 SV=2	0.711261	0.518424	0.32803	0.590217	1.56774	0.691049	0.574788	1.04294
P50446	32	3	Keratin, type II cytoskeletal 6A OS=Mus musculus OX=10090 GN=Krt6a PE=1 SV=3	0.37986	0.527133	0.322274	0.343515	0.854467	0.693882	0.616719	0.641164
Q6NXH9	29	16	Keratin, type II cytoskeletal 73 OS=Mus musculus OX=10090 GN=Krt73 PE=1 SV=1	0.658884	0.535864	0.229221	0.374156	1.53473	0.729418	0.382267	0.702529
P19123	4	3	Troponin C, slow skeletal and cardiac muscles OS=Mus musculus OX=10090 GN=Tnnc1 PE=1 SV=1	0.328328	0.496739	0.348848	0.215844	0.666852	0.680353	0.528714	0.379309
Q8BGZ7	21	7	Keratin, type II cytoskeletal 75 OS=Mus musculus OX=10090 GN=Krt75 PE=1 SV=1	0.375657	0.486541	0.246159	0.329024	0.864735	0.655598	0.414757	0.586522
Q99M87	4	3	DnaJ homolog subfamily A member 3, mitochondrial OS=Mus musculus OX=10090 GN=Dnaja3 PE=1 SV=1	0.0345234	0.205666	0.104332	0.0962146	0.0555149	0.35082	0.166036	0.211829
Q9Z2K1	29	16	Keratin, type I cytoskeletal 16 OS=Mus musculus OX=10090 GN=Krt16 PE=1 SV=3	0.63609	0.394054	0.614706	0.56065	1.06162	0.541634	1.32763	1.22475
A2AEV7	2	2	Coiled-coil domain-containing protein 120 OS=Mus musculus OX=10090 GN=Ccdc120 PE=1 SV=1	0.250631	0.239712	0.158581	0.0472856	0.599947	0.347333	0.223702	0.0956513
Q61414	26	13	Keratin, type I cytoskeletal 15 OS=Mus musculus OX=10090 GN=Krt15 PE=1 SV=2	0.321973	0.400552	0.300138	0.747811	0.688607	0.526361	0.492035	1.32613
P98086	7	5	Complement C1q subcomponent subunit A OS=Mus musculus OX=10090 GN=C1qa PE=1 SV=2	0.110105	0.26779	0.105818	0.0374651	0.192447	0.373418	0.187672	0.0807362
Q9D5N8	3	2	Spermidine/spermine N(1)-acetyltransferase-like protein 1 OS=Mus musculus OX=10090 GN=Satl1 PE=2 SV=2	0.139705	0.282252	0.215696	0.443967	0.308854	0.426422	0.400402	0.642052
Q7TQK0	1	1	Cyclin-T2 OS=Mus musculus OX=10090 GN=Ccnt2 PE=1 SV=1	0.163886	0.317651	0.221319	0.237837	0.362693	0.460458	0.363615	0.389887
Q9QWL7	22	4	Keratin, type I cytoskeletal 17 OS=Mus musculus OX=10090 GN=Krt17 PE=1 SV=3	0.191691	0.282375	0.431835	0.145738	0.37002	0.386465	0.531125	0.249296
Q99PS0	4	4	Keratin, type I cytoskeletal 23 OS=Mus musculus OX=10090 GN=Krt23 PE=1 SV=1	1.08812	0.322893	1.31553	1.09776	1.65436	0.429107	2.93214	2.4117
P22599	20	6	Alpha-1-antitrypsin 1-2 OS=Mus musculus OX=10090 GN=Serpina1b PE=1 SV=2	0.356177	0.448132	0.302454	0.266498	0.668171	0.591075	0.548737	0.531224
P07758;Q00896	20	5	Alpha-1-antitrypsin 1-1 OS=Mus musculus OX=10090 GN=Serpina1a PE=1 SV=4	0.41798	0.393514	0.376067	0.333476	0.781592	0.518008	0.722832	0.682312
P01794;P01787;P01788;P01790;P01791	1	1	Ig heavy chain V region HPCG14 OS=Mus musculus OX=10090 PE=1 SV=1	0.173075	0.319663	0.296047	0.271356	0.37327	0.453153	0.484199	0.449818
P03995	6	1	Glial fibrillary acidic protein OS=Mus musculus OX=10090 GN=Gfap PE=1 SV=4	0.40558	0.337861	0.0812983	0.101035	0.950665	0.454223	0.140472	0.228524
Q921I1	60	54	Serotransferrin OS=Mus musculus OX=10090 GN=Tf PE=1 SV=1	1.21572	0.275469	1.14389	0.913164	1.97874	0.380364	2.21273	1.944
Q6ZWX6	3	2	Eukaryotic translation initiation factor 2 subunit 1 OS=Mus musculus OX=10090 GN=Eif2s1 PE=1 SV=3	0.111421	0.157926	0.186572	0.0869644	0.24478	0.254128	0.4119	0.191777
Q8R550	1	1	SH3 domain-containing kinase-binding protein 1 OS=Mus musculus OX=10090 GN=Sh3kbp1 PE=1 SV=1	0.136011	0.22083	0.0884335	0.0602467	0.310854	0.309706	0.106317	0.105055
P06909	35	25	Complement factor H OS=Mus musculus OX=10090 GN=Cfh PE=1 SV=2	0.308518	0.305164	0.661378	0.436722	0.58625	0.393193	0.96939	0.81199
P08226	18	13	Apolipoprotein E OS=Mus musculus OX=10090 GN=Apoe PE=1 SV=2	0.105385	0.286189	0.234276	0.255454	0.193836	0.380746	0.351989	0.402978
Q91VI7	4	3	Ribonuclease inhibitor OS=Mus musculus OX=10090 GN=Rnh1 PE=1 SV=1	0.244466	0.250664	0.183011	0.283905	0.545871	0.356491	0.377287	0.42794
E9PV87	4	1	Protein TALPID3 OS=Mus musculus OX=10090 GN=Talpid3 PE=1 SV=1	0.62293	0.196003	0.190731	0.0273317	1.35894	0.292768	0.338808	0.0603236
Q91X72	31	29	Hemopexin OS=Mus musculus OX=10090 GN=Hpx PE=1 SV=2	0.994926	0.485035	0.71233	0.749278	1.66393	0.629521	1.17826	1.44675
Q3UV17	28	14	Keratin, type II cytoskeletal 2 oral OS=Mus musculus OX=10090 GN=Krt76 PE=1 SV=1	0.0919403	0.19396	0.129118	0.0644047	0.169623	0.259575	0.251392	0.139527
P01863;P01865;P84751	16	13	Ig gamma-2A chain C region, A allele OS=Mus musculus OX=10090 GN=Ighg PE=1 SV=1	1.54983	0.341116	1.39818	1.08937	2.21255	0.445596	3.05798	2.45137
Q9JL35	10	8	High mobility group nucleosome-binding domain-containing protein 5 OS=Mus musculus OX=10090 GN=Hmgn5 PE=1 SV=2	0.711347	0.490098	0.493953	0.736932	1.40828	0.638609	0.799132	1.39032
P35821	4	2	Tyrosine-protein phosphatase non-receptor type 1 OS=Mus musculus OX=10090 GN=Ptpn1 PE=1 SV=2	0.191903	0.186015	0.479542	0.12665	0.410575	0.269547	0.616551	0.250991
Q9D312	7	3	Keratin, type I cytoskeletal 20 OS=Mus musculus OX=10090 GN=Krt20 PE=1 SV=1	0.189042	0.236414	0.224957	0.126026	0.348885	0.333412	0.35968	0.2356
P49749	1	1	Homeobox even-skipped homolog protein 2 OS=Mus musculus OX=10090 GN=Evx2 PE=2 SV=1	0.0989694	0.115559	0.333704	0.798145	0.136216	0.167933	0.728997	1.80581
Q61646	25	23	Haptoglobin OS=Mus musculus OX=10090 GN=Hp PE=1 SV=1	0.596926	0.345091	0.859661	0.614252	0.865259	0.436438	1.61945	1.28963
P06330;P01750;P01756;P01757	6	6	Ig heavy chain V region AC38 205.12 OS=Mus musculus OX=10090 PE=1 SV=1	0.225936	0.199662	0.221987	0.253731	0.416478	0.277633	0.437452	0.470332
Q61704	6	4	Inter-alpha-trypsin inhibitor heavy chain H3 OS=Mus musculus OX=10090 GN=Itih3 PE=1 SV=3	0.0492471	0.118165	0.0451211	0.0244796	0.102663	0.167993	0.0751568	0.0535263
Q9CQ20	1	1	Mid1-interacting protein 1 OS=Mus musculus OX=10090 GN=Mid1ip1 PE=1 SV=1	0.056551	0.368134	0.107992	0.122274	0.0943534	0.448024	0.185744	0.18466
P07309	8	7	Transthyretin OS=Mus musculus OX=10090 GN=Ttr PE=1 SV=1	0.239809	0.157746	0.307951	0.268992	0.345108	0.218322	0.61801	0.583854
P12246	10	8	Serum amyloid P-component OS=Mus musculus OX=10090 GN=Apcs PE=1 SV=2	0.12492	0.163271	0.215838	0.139894	0.223872	0.230601	0.323352	0.265418
Q6IFZ6	26	15	Keratin, type II cytoskeletal 1b OS=Mus musculus OX=10090 GN=Krt77 PE=1 SV=1	0.231363	0.228494	0.194891	0.190369	0.489619	0.296731	0.318594	0.345997
P35441	11	11	Thrombospondin-1 OS=Mus musculus OX=10090 GN=Thbs1 PE=1 SV=1	0.072921	0.169709	0.117523	0.097911	0.139416	0.222454	0.172796	0.159582
P05784	5	1	Keratin, type I cytoskeletal 18 OS=Mus musculus OX=10090 GN=Krt18 PE=1 SV=5	0.126196	0.177406	0.0581167	0.0793936	0.280446	0.230759	0.0982104	0.135162
Q9WVF6	1	1	Group IID secretory phospholipase A2 OS=Mus musculus OX=10090 GN=Pla2g2d PE=1 SV=1	0.102642	0.169265	0.119057	0.140239	0.2197	0.237143	0.191395	0.251363
Q3UHB8	2	1	Coiled-coil domain-containing protein 177 OS=Mus musculus OX=10090 GN=Ccdc177 PE=1 SV=1	0.106348	0.126656	0.233584	0.0993532	0.185975	0.16221	0.358372	0.214293
P01837	10	9	Immunoglobulin kappa constant OS=Mus musculus OX=10090 GN=Igkc PE=1 SV=2	0.775204	0.268714	0.547092	0.350118	1.09327	0.34607	0.868827	0.757655
Q9JJN5	6	6	Carboxypeptidase N catalytic chain OS=Mus musculus OX=10090 GN=Cpn1 PE=1 SV=1	0.0507711	0.140189	0.0596909	0.0506043	0.0987329	0.191026	0.0918657	0.0946732
P39876	7	5	Metalloproteinase inhibitor 3 OS=Mus musculus OX=10090 GN=Timp3 PE=1 SV=1	0.101498	0.2965	0.111973	0.0976524	0.15089	0.353738	0.174111	0.167362
Q62168	5	3	Keratin, type I cuticular Ha2 OS=Mus musculus OX=10090 GN=Krt32 PE=1 SV=2	0.110955	0.115939	0.327754	0.0586818	0.222873	0.159941	0.407839	0.0993035
Q60590;P07361	7	7	Alpha-1-acid glycoprotein 1 OS=Mus musculus OX=10090 GN=Orm1 PE=1 SV=1	0.229792	0.0896787	0.113065	0.0936656	0.331473	0.127571	0.199938	0.215345
Q8VCN9	1	1	Tubulin-specific chaperone C OS=Mus musculus OX=10090 GN=Tbcc PE=1 SV=1	0.0513363	0.132395	0.0817475	0.0817039	0.117026	0.187417	0.152462	0.135629
A6X935	21	13	Inter alpha-trypsin inhibitor, heavy chain 4 OS=Mus musculus OX=10090 GN=Itih4 PE=1 SV=2	0.139178	0.0930794	0.257983	0.170397	0.251246	0.136944	0.401134	0.323182
Q8VCR3	2	2	Transmembrane protein 242 OS=Mus musculus OX=10090 GN=Tmem242 PE=2 SV=1	0.0278664	0.0895175	0.0272019	0.0286079	0.040737	0.105054	0.0567848	0.0660899
Q61702	9	8	Inter-alpha-trypsin inhibitor heavy chain H1 OS=Mus musculus OX=10090 GN=Itih1 PE=1 SV=2	0.125761	0.137912	0.0781884	0.0366267	0.18047	0.177425	0.130181	0.0824562
Q06890	11	10	Clusterin OS=Mus musculus OX=10090 GN=Clu PE=1 SV=1	0.0815405	0.156591	0.0779755	0.0522789	0.136528	0.209075	0.125831	0.104764
Q3UKC1	7	5	Tax1-binding protein 1 homolog OS=Mus musculus OX=10090 GN=Tax1bp1 PE=1 SV=2	0.0468144	0.0810257	0.266587	0.542682	0.103599	0.109536	0.315059	0.834672
Q8BXK9	2	2	Chloride intracellular channel protein 5 OS=Mus musculus OX=10090 GN=Clic5 PE=1 SV=1	0.303616	0.156685	0.243019	0.139898	0.624582	0.207056	0.396879	0.31841
P01942	4	4	Hemoglobin subunit alpha OS=Mus musculus OX=10090 GN=Hba PE=1 SV=2	0.09347	0.193067	0.206964	0.142558	0.136114	0.239716	0.337653	0.29676
P01878	14	13	Ig alpha chain C region OS=Mus musculus OX=10090 PE=1 SV=1	0.321283	0.17344	0.377842	0.263653	0.477709	0.230031	0.730682	0.559294
Q61838	74	67	Pregnancy zone protein OS=Mus musculus OX=10090 GN=Pzp PE=1 SV=3	0.932798	0.150505	0.515812	0.460051	1.36818	0.199005	1.05081	1.03485
Q6IFX3	5	3	Keratin, type I cytoskeletal 40 OS=Mus musculus OX=10090 GN=Krt40 PE=2 SV=1	0.719756	0.163792	1.14435	0.509309	1.0257	0.204266	1.92931	1.13368
Q9R118	4	2	Serine protease HTRA1 OS=Mus musculus OX=10090 GN=Htra1 PE=1 SV=2	0.0289156	0.0679216	0.0270974	0.0476669	0.0649778	0.0967157	0.0539495	0.0781753
O89020	22	19	Afamin OS=Mus musculus OX=10090 GN=Afm PE=1 SV=2	0.346568	0.203472	0.23909	0.121353	0.584569	0.253147	0.35857	0.24282
P97857	4	4	A disintegrin and metalloproteinase with thrombospondin motifs 1 OS=Mus musculus OX=10090 GN=Adamts1 PE=1 SV=4	0.081449	0.0658382	0.132982	0.0390702	0.187052	0.0948602	0.177499	0.0756854
Q02105	6	4	Complement C1q subcomponent subunit C OS=Mus musculus OX=10090 GN=C1qc PE=1 SV=2	0.0693509	0.125957	0.128149	0.103548	0.120483	0.162749	0.184522	0.156125
P19221	25	21	Prothrombin OS=Mus musculus OX=10090 GN=F2 PE=1 SV=1	0.211303	0.0829983	0.137612	0.0853751	0.328402	0.120622	0.239249	0.179082
P06728	20	19	Apolipoprotein A-IV OS=Mus musculus OX=10090 GN=Apoa4 PE=1 SV=3	0.185807	0.0642964	0.338461	0.15451	0.301916	0.0992754	0.476244	0.289711
Q8K1I3	5	4	Secreted phosphoprotein 24 OS=Mus musculus OX=10090 GN=Spp2 PE=1 SV=2	0.0767749	0.0891072	0.14107	0.12597	0.126025	0.119443	0.208494	0.238041
Q8VE92	1	1	RNA-binding protein 4B OS=Mus musculus OX=10090 GN=Rbm4b PE=1 SV=1	0.0871807	0.121229	0.0604923	0.0988627	0.179416	0.149918	0.12888	0.171154
P06537	2	2	Glucocorticoid receptor OS=Mus musculus OX=10090 GN=Nr3c1 PE=1 SV=1	0.122799	0.0639593	0.423217	0.191076	0.199683	0.0887749	0.614081	0.367484
Q8BHB9	2	2	Chloride intracellular channel protein 6 OS=Mus musculus OX=10090 GN=Clic6 PE=1 SV=1	0.136442	0.0980244	0.213939	0.170868	0.206791	0.129418	0.447837	0.350632
P23953;Q8VCC2	19	11	Carboxylesterase 1C OS=Mus musculus OX=10090 GN=Ces1c PE=1 SV=4	0.153265	0.194452	0.187465	0.185499	0.240207	0.217599	0.340003	0.367335
P26262	22	18	Plasma kallikrein OS=Mus musculus OX=10090 GN=Klkb1 PE=1 SV=2	0.150146	0.129388	0.141598	0.0837969	0.272188	0.167898	0.218414	0.15935
P41317	5	4	Mannose-binding protein C OS=Mus musculus OX=10090 GN=Mbl2 PE=1 SV=2	0.0745207	0.0797131	0.169432	0.0776047	0.15172	0.106446	0.213891	0.12551
Q9WV06	3	1	Ankyrin repeat domain-containing protein 2 OS=Mus musculus OX=10090 GN=Ankrd2 PE=1 SV=3	0.143563	0.160876	0.164181	0.0502594	0.299318	0.207749	0.247158	0.113769
Q6P2L7	3	3	Protein CASC4 OS=Mus musculus OX=10090 GN=Casc4 PE=1 SV=1	0.290928	0.122305	0.453474	0.289376	0.412346	0.156563	0.941785	0.634906
Q6IME9	14	7	Keratin, type II cytoskeletal 72 OS=Mus musculus OX=10090 GN=Krt72 PE=3 SV=1	0.425642	0.192501	0.95059	1.30375	0.592756	0.221675	2.12313	2.32164
P06869	1	1	Urokinase-type plasminogen activator OS=Mus musculus OX=10090 GN=Plau PE=1 SV=1	0.136514	0.147197	0.18588	0.0935604	0.208226	0.19054	0.364933	0.187933
P01592	5	4	Immunoglobulin J chain OS=Mus musculus OX=10090 GN=Jchain PE=1 SV=4	0.0962017	0.12967	0.105401	0.0958479	0.146025	0.161938	0.210903	0.185855
P43025	6	4	Tetranectin OS=Mus musculus OX=10090 GN=Clec3b PE=1 SV=2	0.0326907	0.18874	0.0705735	0.0336863	0.0473579	0.236459	0.102339	0.0599764
O88803	2	2	Leukocyte cell-derived chemotaxin-2 OS=Mus musculus OX=10090 GN=Lect2 PE=1 SV=1	0.0300575	0.0845828	0.0446695	0.0146343	0.0536653	0.101581	0.0600959	0.0317949
P01869;P01868	15	12	Ig gamma-1 chain C region, membrane-bound form OS=Mus musculus OX=10090 GN=Ighg1 PE=1 SV=2	0.168237	0.130168	0.404656	0.176267	0.259778	0.167683	0.714066	0.377426
P02088;P02104	8	7	Hemoglobin subunit beta-1 OS=Mus musculus OX=10090 GN=Hbb-b1 PE=1 SV=2	0.0687207	0.0656123	0.0902107	0.0879191	0.116824	0.0900194	0.145839	0.167401
P04186	13	12	Complement factor B OS=Mus musculus OX=10090 GN=Cfb PE=1 SV=2	0.15774	0.100106	0.129799	0.132738	0.246122	0.117735	0.247339	0.256552
Q8VCM7	15	11	Fibrinogen gamma chain OS=Mus musculus OX=10090 GN=Fgg PE=1 SV=1	0.0587202	0.0450025	0.241179	0.0930749	0.119225	0.0608432	0.327381	0.173402
P19426	1	1	Negative elongation factor E OS=Mus musculus OX=10090 GN=Nelfe PE=1 SV=2	0.110428	0.038366	0.0524411	0.0245973	0.260074	0.0562734	0.0607988	0.0564296
Q00897	20	4	Alpha-1-antitrypsin 1-4 OS=Mus musculus OX=10090 GN=Serpina1d PE=1 SV=1	0.0468828	0.0787736	0.13362	0.0294467	0.0936503	0.0963092	0.172815	0.0568195
Q8K0E8	15	14	Fibrinogen beta chain OS=Mus musculus OX=10090 GN=Fgb PE=1 SV=1	0.0755711	0.0981524	0.186808	0.119677	0.120889	0.122132	0.271145	0.212172
P28665	59	32	Murinoglobulin-1 OS=Mus musculus OX=10090 GN=Mug1 PE=1 SV=3	0.157802	0.0489429	0.133454	0.113069	0.235852	0.065326	0.258924	0.244168
P20918	24	19	Plasminogen OS=Mus musculus OX=10090 GN=Plg PE=1 SV=3	0.0464294	0.0690331	0.0690389	0.0333211	0.0731935	0.0865729	0.0976157	0.0747602
Q80YC5	12	8	Coagulation factor XII OS=Mus musculus OX=10090 GN=F12 PE=1 SV=2	0.190219	0.172983	0.120053	0.0384422	0.27101	0.21071	0.194531	0.0743888
P18052	3	1	Receptor-type tyrosine-protein phosphatase alpha OS=Mus musculus OX=10090 GN=Ptpra PE=1 SV=3	0.1991	0.0668872	0.275741	0.269556	0.295115	0.0904132	0.650013	0.602671
P01727;P01723	1	1	Ig lambda-1 chain V region S43 OS=Mus musculus OX=10090 PE=1 SV=1	0.0668212	0.126467	0.133854	3.40667	0.117893	0.143651	0.169573	4.70743
P02089	7	4	Hemoglobin subunit beta-2 OS=Mus musculus OX=10090 GN=Hbb-b2 PE=1 SV=2	0.102845	0.0731525	0.170572	0.0938905	0.167042	0.0929357	0.315051	0.202136
Q6GQT1	6	3	Alpha-2-macroglobulin-P OS=Mus musculus OX=10090 GN=A2m PE=2 SV=2	0.0355242	0.0825288	0.0323235	0.0689959	0.0525092	0.103375	0.0512675	0.123189
P24369	7	4	Peptidyl-prolyl cis-trans isomerase B OS=Mus musculus OX=10090 GN=Ppib PE=1 SV=2	0.0297311	0.147824	0.056943	0.0348789	0.0435732	0.174281	0.103494	0.0633506
Q03734	17	4	Serine protease inhibitor A3M OS=Mus musculus OX=10090 GN=Serpina3m PE=1 SV=2	0.070549	0.0566714	0.0948271	0.0534541	0.156831	0.07099	0.131135	0.099412
Q3B7Z2	7	4	Oxysterol-binding protein 1 OS=Mus musculus OX=10090 GN=Osbp PE=1 SV=3	0.0531918	0.0178634	0.405266	0.0536351	0.0947854	0.0281493	0.494425	0.0910406
Q61129	8	7	Complement factor I OS=Mus musculus OX=10090 GN=Cfi PE=1 SV=3	0.0383783	0.0200257	0.0796573	0.0227019	0.0575261	0.0306997	0.105199	0.0514145
P19246	7	3	Neurofilament heavy polypeptide OS=Mus musculus OX=10090 GN=Nefh PE=1 SV=3	0.0445544	0.0270301	0.189803	0.0444551	0.0911357	0.0393053	0.261473	0.0737183
P63260;P60710;P62737;P63268;P68033;P68134	5	1	Actin, cytoplasmic 2 OS=Mus musculus OX=10090 GN=Actg1 PE=1 SV=1	0.029232	0.0358253	0.0221283	0.0227661	0.0421229	0.045508	0.0349887	0.0524456
Q91WP6;Q80X76	14	5	Serine protease inhibitor A3N OS=Mus musculus OX=10090 GN=Serpina3n PE=1 SV=1	0.209488	0.0583986	0.279991	0.204119	0.298928	0.0747763	0.552841	0.410964
E9Q286	6	4	Little elongation complex subunit 1 OS=Mus musculus OX=10090 GN=Ice1 PE=1 SV=1	0.0616758	0.0235883	0.0132192	0.0175626	0.0866845	0.0323426	0.0219269	0.0399772
Q6P6J9	1	1	Thioredoxin domain-containing protein 15 OS=Mus musculus OX=10090 GN=Txndc15 PE=1 SV=1	0.000748993	0.0134625	0.00107916	0.00131739	0.00103675	0.0230138	0.00193474	0.00301548
Q922G7	2	2	Tektin-2 OS=Mus musculus OX=10090 GN=Tekt2 PE=1 SV=1	0.0481736	0.0445462	0.0276995	0.0285071	0.0989564	0.0583128	0.0404624	0.0609867
A1L317	9	7	Keratin, type I cytoskeletal 24 OS=Mus musculus OX=10090 GN=Krt24 PE=2 SV=2	0.142285	0.0599806	0.107722	0.112669	0.206856	0.0742694	0.225054	0.251638
P03987	11	9	Ig gamma-3 chain C region OS=Mus musculus OX=10090 PE=1 SV=2	0.0749367	0.059117	0.110808	0.128983	0.114751	0.0773119	0.191162	0.200941
P13020	12	9	Gelsolin OS=Mus musculus OX=10090 GN=Gsn PE=1 SV=3	0.012656	0.0250086	0.0227207	0.0274505	0.0198874	0.0316658	0.030626	0.0490245
P11679	11	4	Keratin, type II cytoskeletal 8 OS=Mus musculus OX=10090 GN=Krt8 PE=1 SV=4	0.0200569	0.02103	0.0727086	0.0493084	0.0358027	0.0298118	0.091253	0.0775182
P97290	3	3	Plasma protease C1 inhibitor OS=Mus musculus OX=10090 GN=Serping1 PE=1 SV=3	0.046498	0.0302124	0.0897719	0.0437393	0.0707095	0.0379232	0.127605	0.0834032
P18528	4	4	Ig heavy chain V region 6.96 OS=Mus musculus OX=10090 PE=4 SV=1	0.071891	0.0581003	0.185188	0.785243	0.107359	0.0775146	0.287729	1.44106
Q8VCT4	11	7	Carboxylesterase 1D OS=Mus musculus OX=10090 GN=Ces1d PE=1 SV=1	0.0398058	0.0256112	0.0490362	0.0402164	0.0587401	0.0324593	0.0830855	0.0893941
Q8VE37	2	2	Regulator of chromosome condensation OS=Mus musculus OX=10090 GN=Rcc1 PE=1 SV=1	0.0643101	0.0323541	0.0632468	0.0268116	0.0903542	0.0406118	0.106033	0.06008
A2ATD1	2	1	Isthmin-1 OS=Mus musculus OX=10090 GN=Ism1 PE=1 SV=1	0.144819	0.0612408	0.136385	0.176098	0.224912	0.0736017	0.270332	0.353797
Q497I4	13	5	Keratin, type I cuticular Ha5 OS=Mus musculus OX=10090 GN=Krt35 PE=1 SV=1	0.1056	0.0291781	0.297566	0.0952324	0.162291	0.0385405	0.418513	0.197978
Q8VCW2	5	3	Keratin, type I cytoskeletal 25 OS=Mus musculus OX=10090 GN=Krt25 PE=1 SV=1	0.0060756	0.0123608	0.00490319	0.00859038	0.012108	0.0176085	0.00902903	0.0158104
P46414	1	1	Cyclin-dependent kinase inhibitor 1B OS=Mus musculus OX=10090 GN=Cdkn1b PE=1 SV=2	0.0216997	0.00620401	0.00761849	0.0092247	0.0344774	0.01056	0.0169226	0.0212415
P01844;P01845	5	4	Ig lambda-2 chain C region OS=Mus musculus OX=10090 GN=Iglc2 PE=1 SV=1	0.0359417	0.0242437	0.117853	0.546594	0.0544975	0.0297669	0.149575	0.776402
Q810N9	3	2	Coiled-coil domain-containing protein 172 OS=Mus musculus OX=10090 GN=Ccdc172 PE=1 SV=1	0.152457	0.0478265	0.142408	0.121995	0.21292	0.0544018	0.305063	0.276605
P01747;P01746	2	2	Ig heavy chain V region 36-65 OS=Mus musculus OX=10090 PE=1 SV=1	0.0425714	0.0405089	0.0769851	0.0388162	0.0623411	0.048357	0.134727	0.0873956
Q8CCX5	2	1	Keratin-like protein KRT222 OS=Mus musculus OX=10090 GN=Krt222 PE=2 SV=1	0.00241665	0.00878349	0.000964661	0.00220796	0.00480417	0.0105574	0.00171445	0.00367957
P52430	4	2	Serum paraoxonase/arylesterase 1 OS=Mus musculus OX=10090 GN=Pon1 PE=1 SV=2	0.0194994	0.0130686	0.0246926	0.0128061	0.0289771	0.0177701	0.0386769	0.0259627
Q9QWK4	11	7	CD5 antigen-like OS=Mus musculus OX=10090 GN=Cd5l PE=1 SV=3	0.0487836	0.0638569	0.0293532	0.0180144	0.0771456	0.0777088	0.052811	0.0366848
Q61805	2	2	Lipopolysaccharide-binding protein OS=Mus musculus OX=10090 GN=Lbp PE=1 SV=2	0.0358567	0.0582963	0.0457184	0.0066383	0.0512551	0.0708919	0.0546282	0.0112473
Q9CSN1	6	2	SNW domain-containing protein 1 OS=Mus musculus OX=10090 GN=Snw1 PE=1 SV=3	0.0592064	0.00935769	0.0218221	0.0183388	0.0836592	0.0118481	0.041647	0.042069
Q9D8L0	2	2	Uncharacterized protein C11orf52 homolog OS=Mus musculus OX=10090 PE=2 SV=1	0.0666959	0.0080286	0.0413204	0.0587162	0.0917098	0.00924292	0.0937616	0.135369
P49138	2	1	MAP kinase-activated protein kinase 2 OS=Mus musculus OX=10090 GN=Mapkapk2 PE=1 SV=2	0.0150541	0.00496595	0.00724454	0.010088	0.0207029	0.00827684	0.0108638	0.0210911
Q80U56	2	2	Late secretory pathway protein AVL9 homolog OS=Mus musculus OX=10090 GN=Avl9 PE=1 SV=2	0.0216793	0.0108041	0.0346964	0.0239035	0.0323229	0.0137324	0.0602438	0.0537075
P01631	6	6	Ig kappa chain V-II region 26-10 OS=Mus musculus OX=10090 PE=1 SV=1	0.0696137	0.0308164	0.0777864	0.0392444	0.0971919	0.039381	0.126745	0.0868662
O55233	3	2	Cerberus OS=Mus musculus OX=10090 GN=Cer1 PE=1 SV=1	0.0595812	0.0118231	0.16064	0.0592023	0.138255	0.0174481	0.38853	0.136035
P01864	7	5	Ig gamma-2A chain C region secreted form OS=Mus musculus OX=10090 PE=1 SV=1	0.100063	0.0269812	0.136735	0.0846538	0.140678	0.0333723	0.243038	0.189503
Q8R2S9	3	3	Actin-related protein 8 OS=Mus musculus OX=10090 GN=Actr8 PE=2 SV=1	0.0264475	0.025945	0.014454	0.00440457	0.0369934	0.0310737	0.0188936	0.00969413
Q61703	14	13	Inter-alpha-trypsin inhibitor heavy chain H2 OS=Mus musculus OX=10090 GN=Itih2 PE=1 SV=1	0.0695524	0.00463857	0.0528573	0.0235444	0.118995	0.00694749	0.075396	0.0501012
P29621	10	3	Serine protease inhibitor A3C OS=Mus musculus OX=10090 GN=Serpina3c PE=2 SV=1	0.00905311	0.00801313	0.0630602	0.0107061	0.0170372	0.0100056	0.0739537	0.0181909
Q8CE08	1	1	Prostatic acid phosphatase OS=Mus musculus OX=10090 GN=Acpp PE=2 SV=1	0.0359643	0.0159136	0.0416139	0.034816	0.0505856	0.0211282	0.0779386	0.0629303
P11477	1	1	Alpha-defensin 1 OS=Mus musculus OX=10090 GN=Defa1 PE=1 SV=2	0.177435	0.14932	0.0453228	4.62148e-05	0.244863	0.172485	0.052295	0.000104726
P01898;P01899;P01901;P03991;P04223;P14428;P14429;P14430	11	9	H-2 class I histocompatibility antigen, Q10 alpha chain OS=Mus musculus OX=10090 GN=H2-Q10 PE=1 SV=3	0.0266944	0.030836	0.0335728	0.0365174	0.0376351	0.0352138	0.0595387	0.0656709
Q9D2A5	2	1	Cyclic AMP-responsive element-binding protein 3-like protein 4 OS=Mus musculus OX=10090 GN=Creb3l4 PE=1 SV=1	0.0526863	0.00504668	0.0227222	0.0166705	0.0724742	0.00570636	0.0263135	0.0383416
Q01339	7	5	Beta-2-glycoprotein 1 OS=Mus musculus OX=10090 GN=Apoh PE=1 SV=1	0.0789375	0.0465883	0.0794161	0.0337953	0.110329	0.055347	0.127479	0.0704247
Q00898	11	2	Alpha-1-antitrypsin 1-5 OS=Mus musculus OX=10090 GN=Serpina1e PE=1 SV=1	0.00658712	0.00968071	0.00436133	0.00395217	0.0118908	0.0121681	0.00670611	0.00632892
Q06770	8	7	Corticosteroid-binding globulin OS=Mus musculus OX=10090 GN=Serpina6 PE=1 SV=1	0.0419426	0.00322333	0.0324736	0.0264481	0.0638538	0.00470497	0.0547819	0.0566232
Q9D7M1	2	2	Glucose-induced degradation protein 8 homolog OS=Mus musculus OX=10090 GN=Gid8 PE=1 SV=1	0.0201388	0.105519	0.023534	0.00707954	0.0278844	0.122671	0.029666	0.0162923
B1AQ75	9	4	Keratin, type I cuticular Ha6 OS=Mus musculus OX=10090 GN=Krt36 PE=1 SV=1	0.0167817	0.0262794	0.138105	0.00750154	0.0262363	0.0299763	0.160136	0.0121155
Q3UZV7	3	2	UPF0577 protein KIAA1324-like homolog OS=Mus musculus OX=10090 PE=1 SV=1	0.00674112	0.000888555	0.012213	0.00112374	0.00927264	0.0015215	0.0142451	0.00256707
Q3TC72	2	1	Fumarylacetoacetate hydrolase domain-containing protein 2A OS=Mus musculus OX=10090 GN=Fahd2 PE=1 SV=1	0.0268351	0.00101186	0.00835978	0.00461673	0.0620355	0.00154253	0.0128989	0.00835629
Q8BKK4	1	1	Protein phosphatase 1 regulatory subunit 1C OS=Mus musculus OX=10090 GN=Ppp1r1c PE=3 SV=1	0.00339176	0.0335985	0.0350978	0.0078388	0.00747906	0.0429098	0.0408137	0.0179653
Q07456	9	8	Protein AMBP OS=Mus musculus OX=10090 GN=Ambp PE=1 SV=2	0.0607625	0.00181635	0.0765103	0.112902	0.0845913	0.00237281	0.156252	0.213399
P01796;P01797;P01798;P01799;P01801;P01803;P01804	2	2	Ig heavy chain V-III region A4 OS=Mus musculus OX=10090 PE=1 SV=1	0.0134052	0.0138556	0.0193961	0.0113886	0.0184591	0.0161361	0.0290294	0.0253612
Q7TN22	2	2	Thioredoxin domain-containing protein 16 OS=Mus musculus OX=10090 GN=Txndc16 PE=2 SV=1	0.0205018	0.000849836	0.00732201	0.00921763	0.0282623	0.00134793	0.0147267	0.0204426
E9PV24	5	4	Fibrinogen alpha chain OS=Mus musculus OX=10090 GN=Fga PE=1 SV=1	0.0374798	0.000617956	0.0250888	0.0174039	0.0676512	0.00103578	0.0357949	0.0399534
Q791N7	1	1	DNA-directed RNA polymerase I subunit RPA12 OS=Mus musculus OX=10090 GN=Znrd1 PE=1 SV=1	0.168986	0.0125342	0.182759	0.144789	0.232462	0.0182948	0.408116	0.332748
Q9DBD0	5	5	Inhibitor of carbonic anhydrase OS=Mus musculus OX=10090 GN=Ica PE=1 SV=1	0.0196076	0.00717391	0.0119219	0.0227967	0.0272081	0.00825565	0.0166322	0.0298758
Q07235	3	2	Glia-derived nexin OS=Mus musculus OX=10090 GN=Serpine2 PE=1 SV=2	0.0301118	0.0378709	0.0217114	0.00115221	0.0414183	0.04313	0.0316153	0.00266842
P40336	2	2	Vacuolar protein sorting-associated protein 26A OS=Mus musculus OX=10090 GN=Vps26a PE=1 SV=1	0.0862499	0.00397787	0.0440189	0.0131042	0.118805	0.00517513	0.0617856	0.0286519
Q9D3R9	2	2	Transcription initiation factor TFIID subunit 7-like OS=Mus musculus OX=10090 GN=Taf7l PE=1 SV=2	0.00755956	0.00084431	0.00532349	0.0130033	0.0106603	0.00108648	0.00897723	0.0293699
P43137	1	1	Lithostathine-1 OS=Mus musculus OX=10090 GN=Reg1 PE=1 SV=1	0.000607355	0.0196375	0.00119302	0.000230971	0.000833265	0.0220223	0.00136184	0.000537857
Q5I2A0	6	1	Serine protease inhibitor A3G OS=Mus musculus OX=10090 GN=Serpina3g PE=1 SV=2	0.00185824	6.76302e-05	0.00269454	0.00475961	0.002589	0.000100581	0.00336156	0.00821754
O35684	2	2	Neuroserpin OS=Mus musculus OX=10090 GN=Serpini1 PE=1 SV=1	0.00807226	0.00175503	0.000948488	0.000155116	0.0112459	0.00201462	0.0011195	0.000331889
Q61765	4	2	Keratin, type I cuticular Ha1 OS=Mus musculus OX=10090 GN=Krt31 PE=1 SV=2	0.00178928	0.00646873	7.58708e-05	1.31672e-05	0.00249201	0.00727624	8.51644e-05	3.04323e-05
O88947	3	1	Coagulation factor X OS=Mus musculus OX=10090 GN=F10 PE=1 SV=1	0.00449784	0.00694227	0.00888906	0.00913614	0.0061897	0.00894231	0.0103285	0.0153839
P01655;P01654	2	1	Ig kappa chain V-III region PC 7132 OS=Mus musculus OX=10090 PE=1 SV=1	0.000738603	0	0.00129751	0	0.00100983	0	0.00148601	0
P50428	1	1	Arylsulfatase A OS=Mus musculus OX=10090 GN=Arsa PE=1 SV=2	0.0068639	0	0.00079926	0.00140415	0.00942379	0	0.000934022	0.00322541
Q9CRA0	1	1	Ecto-ADP-ribosyltransferase 4 OS=Mus musculus OX=10090 GN=Art4 PE=1 SV=1	0.13103	0.0014996	0.0271457	0.0374333	0.180296	0.00156339	0.064562	0.086143
P01634	2	1	Ig kappa chain V-V region MOPC 21 OS=Mus musculus OX=10090 PE=1 SV=1	0.00351224	0.00500673	0.000610488	0.0030142	0.00488382	0.00482082	0.000967825	0.00678744
P01635	2	1	Ig kappa chain V-V region K2 (Fragment) OS=Mus musculus OX=10090 PE=1 SV=1	0.0120165	0.0336999	0.0331538	0.0072516	0.0165187	0.0360652	0.0422779	0.0167562
Q91VE6	2	2	MKI67 FHA domain-interacting nucleolar phosphoprotein OS=Mus musculus OX=10090 GN=Nifk PE=1 SV=1	0.0586136	0.0420113	0.00660956	0.0104096	0.0805159	0.0427621	0.00980413	0.023941
Q62082	1	1	Myosin regulatory light chain 10 OS=Mus musculus OX=10090 GN=Myl10 PE=2 SV=1	0.00920352	0	0.0255343	0.00655189	0.0128828	0	0.0312968	0.0150318
A2ADF7	1	1	Solute carrier family 25 member 34 OS=Mus musculus OX=10090 GN=Slc25a34 PE=1 SV=1	0.111193	0	0.00733525	0	0.264916	0	0.00846126	0
Q80VD1	1	1	Protein FAM98B OS=Mus musculus OX=10090 GN=Fam98b PE=1 SV=1	0.0472996	0.000297249	0.00197127	0.000580286	0.0655333	0.000440175	0.00258435	0.00130954
P97808	2	1	FXYD domain-containing ion transport regulator 5 OS=Mus musculus OX=10090 GN=Fxyd5 PE=1 SV=3	0.00520621	3.41496e-06	0.00336503	0.00283828	0.00711579	4.15462e-06	0.00394993	0.00653548
P97760	1	1	DNA-directed RNA polymerase II subunit RPB3 OS=Mus musculus OX=10090 GN=Polr2c PE=1 SV=2	0.0170736	0.00016742	0.0118282	0.0117171	0.0234957	0.000228134	0.0243242	0.0268397
Q8BFX1	1	1	E3 ubiquitin-protein ligase RNF187 OS=Mus musculus OX=10090 GN=Rnf187 PE=1 SV=2	0.00386033	0.000436492	2.74209e-05	0.00252785	0.00535487	0.00050483	3.2177e-05	0.00590174
P01668;P01656;P01660;P01664;P01665;P01666;P01667;P01669;P03977	2	1	Ig kappa chain V-III region PC 7210 OS=Mus musculus OX=10090 PE=1 SV=1	0.0170866	0.00208776	0.0177847	0.011609	0.0236201	0.00257557	0.0290098	0.0266911
P15535	1	1	Beta-1,4-galactosyltransferase 1 OS=Mus musculus OX=10090 GN=B4galt1 PE=1 SV=1	0.000157844	0.0365545	0.0266664	0.261089	0.000226268	0.0348715	0.035412	0.448536
Q9Z319	3	2	Atrial natriuretic peptide-converting enzyme OS=Mus musculus OX=10090 GN=Corin PE=2 SV=2	0.00762809	0.000102538	0.00935789	0.00264319	0.0105396	0.000132246	0.0111097	0.00599926
Q69ZP3	2	1	Probable hydrolase PNKD OS=Mus musculus OX=10090 GN=Pnkd PE=1 SV=2	0.000395185	0	0.000293978	0.000607672	0.000545615	0	0.000335365	0.00138558
Q9QXC1	4	3	Fetuin-B OS=Mus musculus OX=10090 GN=Fetub PE=1 SV=1	0.0200574	0	0.00546634	0.0100277	0.0276583	0	0.0104395	0.0230534
Q64726	2	1	Zinc-alpha-2-glycoprotein OS=Mus musculus OX=10090 GN=Azgp1 PE=1 SV=2	0.00154675	0	0	7.65795e-05	0.00212185	0	0	0.000173535
Q99N28	2	2	Cell adhesion molecule 3 OS=Mus musculus OX=10090 GN=Cadm3 PE=1 SV=1	0.00710798	0	0.00456186	0.0017355	0.00977575	0	0.00554338	0.00402038
P56371	2	2	Ras-related protein Rab-4A OS=Mus musculus OX=10090 GN=Rab4a PE=1 SV=2	0.00284342	0	0.0204534	0.00281538	0.0039137	0	0.0238123	0.00654088
P01663;P01662	2	1	Ig kappa chain V-III region PC 4050 OS=Mus musculus OX=10090 PE=1 SV=1	0.00198002	0	0.00427038	0.000588336	0.00272127	0	0.00482057	0.00133279
Q9JM90	2	1	Signal-transducing adaptor protein 1 OS=Mus musculus OX=10090 GN=Stap1 PE=1 SV=1	0.00190706	0.00240645	0.0108538	0.0149452	0.00263782	0.00269667	0.0261079	0.033591
Q99KJ0	1	1	UBX domain-containing protein 2A OS=Mus musculus OX=10090 GN=Ubxn2a PE=1 SV=1	0.00208009	0	0.000230697	0.00131325	0.00285885	0	0.000568643	0.00303867
Q8BXG3	1	1	Intraflagellar transport protein 57 homolog OS=Mus musculus OX=10090 GN=Ift57 PE=1 SV=1	0.0140491	0	0.00374562	0.00190892	0.0193593	0	0.00433405	0.00440165
O35615	1	1	Zinc finger protein ZFPM1 OS=Mus musculus OX=10090 GN=Zfpm1 PE=1 SV=1	0.00172142	0.012295	0	0	0.0023791	0.0126845	0	0
Q8CFG9;Q8CG16	1	1	Complement C1r-B subcomponent OS=Mus musculus OX=10090 GN=C1rb PE=2 SV=1	0.00466173	0	0.014566	0.0531222	0.00639701	0	0.0167661	0.055628
P01647	2	1	Ig kappa chain V-V region HP 124E1 OS=Mus musculus OX=10090 PE=1 SV=1	0.00594474	0	0.000270322	0	0.00816587	0	0.000315701	0
P03953	1	1	Complement factor D OS=Mus musculus OX=10090 GN=Cfd PE=1 SV=1	0.0129491	0	0	0	0.0178145	0	0	0
Q8R368	1	1	Dynein assembly factor 4, axonemal OS=Mus musculus OX=10090 GN=Dnaaf4 PE=1 SV=2	0	0	0	0	0	0	0	0
P01636	1	1	Ig kappa chain V-V region MOPC 149 OS=Mus musculus OX=10090 PE=1 SV=1	0.00544338	0.000890235	0.000991947	0.00137974	0.00748519	0.000927857	0.0013418	0.00314679
P01843	5	4	Ig lambda-1 chain C region OS=Mus musculus OX=10090 PE=1 SV=1	0.021051	0.00859681	0.00625918	0.00707083	0.0289559	0.0100258	0.010926	0.0155233
P01896	2	1	H-2 class I histocompatibility antigen, alpha chain (Fragment) OS=Mus musculus OX=10090 PE=2 SV=1	0.0279688	0.00262078	0.00857916	0.0180809	0.0384913	0.00312687	0.0173512	0.04161
P01633	2	1	Ig kappa chain V19-17 OS=Mus musculus OX=10090 GN=Igk-V19-17 PE=1 SV=1	0	0	0.00242925	0.00114424	0	0	0.00327735	0.00257374
Q7TN02	1	1	Mediator of RNA polymerase II transcription subunit 26 OS=Mus musculus OX=10090 GN=Med26 PE=1 SV=1	0.00351451	0	0.000247823	0.00501816	0.00481845	0	0.000610856	0.0114915
